1 **Full title:** Impacts of temperature on Zika virus transmission potential: combining empirical and  
2 mechanistic modeling approaches

3 **Short title:** Impacts of temperature on Zika virus transmission  
4

5 <sup>1,2</sup>Blanka Tesla, <sup>1</sup>Leah R. Demakovsky, <sup>3</sup>Erin A. Mordecai, <sup>4</sup>Matthew H. Bonds, <sup>5</sup>Calistus N.  
6 Ngonghala, <sup>1,6,7</sup>Melinda A. Brindley, <sup>1,2,7,8,9,10\*</sup>Courtney C. Murdock  
7

8 <sup>1</sup>Department of Infectious Diseases, College of Veterinary Medicine, University of Georgia,  
9 Athens, Georgia, USA

10 <sup>2</sup>Center for Tropical and Emerging Global Diseases, University of Georgia, Athens, Georgia,  
11 USA

12 <sup>3</sup>Biology Department, Stanford University, Stanford, California, USA

13 <sup>4</sup>Department of Global Health and Social Medicine, Harvard Medical School, Boston,  
14 Massachusetts, USA

15 <sup>5</sup>Department of Mathematics, University of Florida, Gainesville, Florida, USA

16 <sup>6</sup>Population Health, University of Georgia, Athens, Georgia, USA

17 <sup>7</sup>Center for Vaccines and Immunology, University of Georgia, Athens, Georgia, USA

18 <sup>8</sup>Odum School of Ecology, University of Georgia, Athens, Georgia, USA

19 <sup>9</sup>Center of Ecology of Infectious Diseases, University of Georgia, Athens, Georgia, USA

20 <sup>10</sup>River Basin Center, University of Georgia, Athens, Georgia, USA  
21

22 \*Corresponding author: [cmurdock@uga.edu](mailto:cmurdock@uga.edu) (CM)  
23

## 24 **Abstract**

25           Diseases like Zika, dengue, and chikungunya, which were once considered tropical and  
26 sub-tropical diseases, are now threatening temperate regions of the world due to climate change,  
27 globalization, and increasing urbanization. Temperature is a strong driver of vector-borne disease  
28 transmission, and characterizing the thermal range and optimum for transmission is essential to  
29 accurately predicting arbovirus emergence and spread. To advance our fundamental scientific  
30 understanding of the relationship between temperature and key pathogen traits for emerging  
31 arboviruses, we conducted a series of experiments to estimate the thermal performance of Zika  
32 virus (ZIKV) in field-derived *Aedes aegypti* across eight constant temperatures. We observed  
33 strong, unimodal effects of temperature on vector competence, extrinsic incubation period, and  
34 mosquito survival. We used thermal responses of these traits to update an existing temperature-  
35 dependent  $R_0$  (the basic reproductive number) model, to infer how temperature impacts ZIKV  
36 transmission. We demonstrated that ZIKV transmission is optimized at a mean temperature of  
37 approximately 29°C, and has a thermal range of 22.7°C to 34.7°C. The predicted thermal  
38 minimum for Zika transmission is 5°C warmer than for dengue virus which suggests that current  
39 estimates on the global environmental suitability for Zika transmission are over-predicting its  
40 possible range. Accurately characterizing the unimodal effect of temperature on emerging  
41 arboviruses, like ZIKV, is critical for estimating the potential geographic and seasonal range for  
42 transmission, and accurately predicting where future climate change will increase, decrease, or  
43 have minimal impact on transmission.

## 44 **Introduction**

45 Mosquito-borne viruses are an emerging threat impacting human health and well-being.  
46 Epidemics of dengue, chikungunya, and Zika have spilled out of Africa to spread explosively  
47 throughout the world creating public health crises. Worldwide, an estimated 3.9 billion people  
48 living within 120 countries are at risk [1]. This pattern began with the growing distribution of  
49 dengue virus (DENV) over the past 30 years, which today infects 390 million people annually  
50 [2]. More recently, chikungunya and Zika viruses rapidly followed suit. Chikungunya virus  
51 (CHIKV) emerged in the Americas in 2013 and have caused 1.8 million suspected cases from 44  
52 countries and territories to date [3]. In 2015-2016, Zika virus (ZIKV) spread throughout the  
53 Americas including the continental U.S., resulting in over 360,000 suspected cases, with likely  
54 many more undetected [3]. With the rise of neurological disorders and birth defects, such as  
55 Guillain-Barré and congenital Zika virus syndrome [4, 5], ZIKV became widely feared and was  
56 declared a “public health emergency of international concern” by the World Health Organization  
57 in 2016 [6]. In spite of growing research efforts to develop new therapeutics, vaccines, and  
58 innovative mosquito control technologies, mitigating arbovirus disease spread still depends on  
59 conventional mosquito control methods and public education.

60 The primary route of transmission is through the bite of infectious female *Aedes*  
61 mosquitoes. In much of the world, the invasive, widespread, and highly anthropophilic *Ae.*  
62 *aegypti* is the main vector responsible for the transmission of these viruses. Diseases like Zika,  
63 dengue, and chikungunya, which were once considered tropical and sub-tropical diseases, are  
64 now threatening temperate regions of the world due to climate change, globalization, and  
65 increasing urbanization [7]. The growing burden of these diseases and their potential to spread  
66 into new areas have incited a flurry of research focusing on the epidemiology, vector control, and

67 predictive models of how these viruses will spread seasonally, geographically, and with the  
68 effects of climate change.

69         There are several key gaps that potentially affect our ability to predict, and ultimately,  
70 mitigate the factors that influence transmission risk and arbovirus emergence globally. First,  
71 current models predicting mosquito distributions or virus transmission are often limited by a  
72 relatively poor understanding of the relationships among mosquito vectors, pathogens, and the  
73 environment. There is substantial evidence that temperature variability is a key driver of disease  
74 transmission across diverse vector-borne pathogen systems [2, 8-16]. Mosquitoes are small  
75 ectothermic animals and their physiology (e.g. immunity [17-19]), life history (e.g. development,  
76 reproduction, survival [14, 20]), and arbovirus fitness (e.g. extrinsic incubation period (EIP) and  
77 vector competence [9, 21-23]) exhibit unimodal responses to changes in temperature.  
78 Transmission depends in large part on the ability of mosquitoes to survive the EIP, become  
79 infectious, and bite new hosts, so differential (unimodal) impacts of temperature on survival,  
80 vector competence, and EIP have highly nonlinear effects on transmission. Warmer temperatures  
81 do not necessarily translate into more infectious mosquitoes [14, 21, 24]. Second, current models  
82 often ignore the low quality and quantity of existing data. Even in systems that are fairly well-  
83 studied (e.g. *Plasmodium falciparum* and DENV), key parameters are often estimated from only  
84 few studies. Finally, current transmission models often assume, with little justification, that the  
85 relationship between temperature and the EIP is monotonic [25], or that the relationships  
86 between temperature, EIP, and vector competence of less-studied arboviruses (e.g. CHIKV and  
87 ZIKV) are similar to DENV [14, 26, 27].

88         To advance our fundamental scientific understanding of the relationship between  
89 temperature and key pathogen traits for emerging arboviruses, we conducted a series of

90 experiments to estimate the thermal performance of ZIKV (vector competence, the extrinsic  
91 incubation rate, and the daily per capita mosquito mortality rate) in field-derived *Ae. aegypti*  
92 across eight different constant temperatures ranging from 16 - 38°C. We fit a series of nonlinear  
93 functions to estimate the thermal responses of the above traits. These thermal responses were  
94 incorporated into a temperature dependent basic reproductive number ( $R_0$ ) model developed for  
95 *Ae. aegypti* and DENV [14] to infer how temperature variation will impact ZIKV transmission.

96

## 97 **Methods**

### 98 **Virus culture**

99 We used the ZIKV isolate MEX1-44 obtained from the University of Texas Medical  
100 Branch (UTMB) Arbovirus Reference Collection. The virus was isolated in January 2016 from a  
101 field-caught *Ae. aegypti* mosquito from Tapachula, Chiapas, Mexico. For all mosquito infections,  
102 we used pass ten stock virus that was passaged four times at the UTMB and additional six times  
103 at the University of Georgia. Four days after inoculation in Vero cells, we harvested the virus,  
104 centrifuged it at 2,500xg for 5 min, and stored it at -80°C. The virus tested negative for  
105 *Mycoplasma* contamination using MycoSensor PCR Assay Kit (Agilent) and was titrated using  
106 standard plaque assays on Vero cells [28]. Briefly, we infected the cells with six 10-fold serial  
107 dilutions for 1-2 hours. After incubation, we removed the inoculum and replaced it with 1.5%  
108 agarose DMEM (UltraPure LMP Agarose, Fisher Scientific). The cells were kept at 37°C, 5%  
109 CO<sub>2</sub> for four days when they were fixed with 4% formalin and stained with crystal violet. The  
110 titers were expressed in plaque forming units per milliliter (PFU/mL).

111

## 112 **Mosquito rearing**

113           Outbred *Ae. aegypti* mosquito colonies were generated from ovitrap collections in  
114 Tapachula, Chiapas, Mexico, spring 2016. Mosquito eggs were hatched in ddH<sub>2</sub>O under reduced  
115 pressure in a vacuum desiccator and dispersed larvae in rearing trays. Each tray contained 200  
116 larvae in 1L ddH<sub>2</sub>O and 4 fish food pellets (Hikari Cichlid Gold Large Pellets). Adult mosquitoes  
117 were kept in rearing cages and provided with 10% sucrose *ad libitum*. We maintained the  
118 colonies on whole human blood (Interstate Blood Bank) and collected eggs on paper towels. The  
119 first three generations (F1-F3) were used for building the colony and generating sufficient eggs  
120 for downstream experiments, which were run with F4 mosquitoes. Larvae and adults were  
121 maintained under standard, controlled insectary conditions at 27°C ± 0.5°C, 80% ± 10% relative  
122 humidity, and a 12:12 light: dark diurnal cycle in a dedicated environmental walk-in room  
123 (Percival Scientific).

124

## 125 **Experimental mosquito infections and forced salivations**

126           For each biological replicate, we separated 8,000 1 to 3-day-old females and transported  
127 them to the ACL3 facility at the University of Georgia 48 hours prior to ZIKV infection.  
128 Mosquitoes were kept in 64 oz. paper cups and provided with water, which was withdrawn 12  
129 hours before feeding. We offered them either an infectious blood meal containing ZIKV at a  
130 final concentration of 10<sup>6</sup> PFU/mL or an uninfected, control blood meal. The blood meal was  
131 prepared by washing human blood three times in RPMI medium and the pelleted red blood cells  
132 (50%) were resuspended in 33% DMEM, 20% FBS, 1% sucrose, and 5 mmol/L ATP. Lastly, for  
133 the infectious blood meal, we mixed the blood mixture with ZIKV diluted in DMEM (2\*10<sup>6</sup>  
134 PFU/mL) at a 1:1 ratio. Mosquitoes were blood-fed through a water-jacketed membrane feeder

135 for 30 min, after which we randomly distributed 2,000 ZIKV-exposed engorged mosquitoes and  
136 2,000 unexposed blood-fed control mosquitoes into mesh-covered paper cups (250 mosquitoes  
137 per cup). We then placed two cups, one ZIKV-exposed and one control, at each temperature  
138 treatments (Percival Scientific): 16°C, 20°C, 24°C, 28°C, 32°C, 34°C, 36°C, and 38°C ± 0.5°C.  
139 Chambers were set to 80% ± 10% relative humidity, a 12:12 hours light: dark photoperiod, and  
140 mosquitoes were provided with 10% sucrose for the duration of the experiment. We monitored  
141 mosquito mortality every day by recording and removing dead mosquitoes.

142       Every three days, up to day 21, we force-salivated 20 ZIKV-exposed mosquitoes per  
143 treatment group. Twenty-three infected mosquitoes from each treatment groups were separated  
144 and provided only water 24 hours prior to forced salivation. The same number of mosquitoes  
145 were removed from the uninfected control group. To force-salivate mosquitoes, we immobilized  
146 mosquitoes by cold knock-down on ice and then by removing their legs and wings. We placed  
147 the proboscis of each mosquito into a pipet tip containing 35 µL FBS with 3 mmol/L ATP and  
148 red food dye, after which they were allowed to salivate for 30 min on a 35°C warming plate.  
149 After salivation, we collected mosquito saliva, put mosquito heads with previously collected  
150 legs, and bodies into separate tubes containing 700 µL of DMEM with 1x antibiotic/antimycotic.  
151 Each tissue was homogenized using 5 mm stainless steel beads in a QIAGEN TissueLyzer at 30  
152 cycles/second for 30 seconds, and centrifuged at 17,000xg for 5 minutes at 4°C. To measure the  
153 proportion of mosquitoes that became infected, disseminated infection, and became infectious at  
154 each temperature, we tested for the presence/absence of the ZIKV in mosquito bodies, legs and  
155 heads, and saliva, respectively. All the samples were tested using plaque assays on Vero cells as  
156 described above. We performed two full biological replicates of this experiment (S1 Fig).

157

## 158 **Statistical analysis**

159           The effects of temperature was assessed on four different metrics of ZIKV infection. We  
160 used the numbers of mosquitoes becoming infected (ZIKV positive bodies), disseminated (ZIKV  
161 positive legs / heads), and infectious (ZIKV positive saliva) out of total numbers of mosquitoes  
162 exposed to assess the effect of temperature on the likelihood of ZIKV infection, dissemination,  
163 and infectiousness at the population level. We also used the numbers of mosquitoes that became  
164 infectious out of those successfully infected as a measure of ZIKV dissemination efficiency. For  
165 each response variable, we used generalized linear mixed models (IBM<sup>®</sup> SPSS<sup>®</sup> Statistics  
166 1.0.0.407), normal distribution and identity link function, to estimate the effects of temperature  
167 (16°C, 20°C, 24°C, 28°C, 32°C, 34°C, 36°C, 38°C), days post infection (dpi 3, 6, 9, 12, 15, 18,  
168 21), and the interaction between temperature and dpi (fixed factors). Mosquito batch nested  
169 within experimental replicate was included in all models as a random factor. We determined the  
170 best model fit and distributions based on Akaike Information Criterion (AIC), the dispersion  
171 parameter, and by plotting model residuals. Sequential Bonferroni tests were used to assess the  
172 significance of pairwise comparisons within a significant main effect or interaction, and *p*-values  
173 greater than 0.05 were considered non-significant. Finally, to estimate the effects of temperature,  
174 ZIKV exposure and the interaction between temperature and ZIKV exposure on the daily  
175 probability of mosquito survival, we used the same framework in a Cox proportional hazards  
176 model (SAS<sup>®</sup> Studio, 3.6 Basic Edition) with temperature, infection status (ZIKV-exposed or  
177 control) and the interaction as fixed factors, with mosquito batch nested within experimental  
178 replicate as a random factor.

179

## 180 **Mechanistic $R_0$ model**



181 Temperature affects a variety of mosquito and virus traits that drive transmission,  
182 including mosquito demography that affects population size—egg-to-adult development rate  
183 (*MDR*), survival probability ( $p_{EA}$ ), and fecundity (*EFD*; eggs per female per day)—as well as  
184 biting rate ( $a$ ), adult mosquito mortality rate ( $\mu$ ), extrinsic incubation rate (*EIR*), and vector  
185 competence ( $bc$ ; equal to the proportion of exposed mosquitoes that become infected times the  
186 proportion of infected mosquitoes that become infectious, with virus in their saliva). In previous  
187 work, we assembled trait thermal response estimates from laboratory experiments that  
188 manipulated temperature and measured each of these traits for *Ae. aegypti* and DENV, and  
189 synthesized them into an estimate for the thermal response of  $R_0$ , the expected number of new  
190 cases generated by a single infectious person or mosquito introduced into a fully susceptible  
191 population throughout the period within which the person or mosquito is infectious [14]:

192

$$R_0(T) = \sqrt{\frac{\alpha(T)^2 bc(T) \exp(-\mu(T)/EIR(T)) EFD(T) p_{EA}(T) MDR(T)}{r \mu(T)^3}}$$

193

194 where  $r$  is the human recovery rate,  $T$  is environmental temperature, and  $T$  attached to a  
195 parameter indicates that the parameter is dependent on temperature. Here, we update three of  
196 these thermal response functions—average adult mosquito lifespan ( $lf=1/\mu$ ), extrinsic incubation  
197 rate (*EIR*), and vector competence ( $bc$ )—using the new experimental data from *Ae. aegypti*  
198 mosquitoes exposed to ZIKV-infected blood meals across a range of constant temperatures.

199 Experimental data on lifespan, vector competence, and extrinsic incubation rates were  
200 used across temperatures to estimate trait thermal response functions for calculating  $R_0(T)$ .  
201 Because we destructively sampled mosquitoes to assess infection status and did not follow all

202 mosquito cohorts to the end of their lifespan, we used Gompertz survival curves to estimate  
203 average lifespan. First, Kaplan-Meier daily probabilities of survival for each experimental  
204 replicate, infection status, and temperature were estimated. Then, we used the ‘nls’ function in R  
205 [29] to fit a Gompertz function to the daily survival probabilities for each infection status by trial  
206 and temperature combination. To estimate the average female lifespan of exposed and control  
207 mosquitoes for each temperature treatment and experimental replicate, we calculated the area  
208 under the curve by integrating the associated Gompertz function. Vector competence for each  
209 temperature was estimated from the average proportion of mosquitoes observed to become  
210 infectious at each temperature. For estimating the ZIKV extrinsic incubation rate (*EIR*) at each  
211 temperature, we calculated the time required for half of the average proportion of the population  
212 to become infectious (and defined this as the average extrinsic incubation period, *EIP*), then  
213 inverted this time interval to estimate a daily rate of ZIKV development for each temperature  
214 ( $1/EIP$ ).

215         Using these data, we fit thermal response functions for lifespan, *EIR*, and vector  
216 competence as either symmetric (Quadratic:  $-c(T-T_0)(T-T_m)$ ) or asymmetric (Briere:  $cT(T-T_0)$   
217  $(T_m-T)^{1/2}$ ) functions, where  $T$  is experimental temperature,  $T_0$  is the minimum temperature,  $T_m$   
218 is the maximum temperature,  $c$  is a rate constant, and both functions are truncated at zero for  
219 negative values [14, 30]. As in previous work [14], we fit the thermal response functions using  
220 Bayesian inference with uninformative priors, which are restricted to biologically reasonable  
221 ranges:  $T_0 \sim \text{Uniform}(0, 24)$ ,  $T_m \sim \text{Uniform}(25, 45)$ ,  $c \sim \text{Gamma}(1, 10)$  for Briere and  $c \sim$   
222  $\text{Gamma}(1, 1)$  for Quadratic [14]. In the model, we assume that the sampling process is a normal  
223 distribution centered on the thermal response function calculated at the experimental  
224 temperature, with precision  $\tau$  (where  $\tau=1/\sigma$ ) assigned the prior:  $\text{Gamma} \sim (0.0001, 0.0001)$ . We

225 fit the models using JAGS [31] and R [29] and the R package ‘rjags’ [32], by running five  
226 Markov Chain Monte Carlo simulations for a 5,000-step burn-in followed by 5,000 additional  
227 steps, then thinning the posterior samples by saving every fifth sample [14, 30].

228 The three new thermal response functions (*lf*, *EIR*, and *bc*) were combined with the  
229 remaining previously-fitted thermal response functions [14] to calculate  $R_0(T)$  for ZIKV. To do  
230 so, we propagated the posterior distribution of each parameter thermal response through the  
231  $R_0(T)$  function to calculate a posterior distribution on  $R_0(T)$ .

232

## 233 **Results**

234 We force-salivated a total of 1,865 mosquitoes for ZIKV infection and monitored the  
235 mortality of 8,000 mosquitoes in both the ZIKV-exposed and uninfected control treatment  
236 groups across two biological replicates and eight mean constant temperatures. We found  
237 significant effects of temperature, days post-infection (dpi), and the interaction between  
238 temperature and dpi on the number of mosquitoes that became infected (ZIKV-positive bodies),  
239 that disseminated infection (ZIKV-positive legs and heads), and that became infectious (ZIKV-  
240 positive saliva). We also found significant effects of temperature, dpi, and their interaction on the  
241 overall transmission efficiency of ZIKV. Finally, these effects translated into significant effects  
242 of temperature on  $R_0$ , or predicted risk of transmission for ZIKV.

243

### 244 **The effect of temperature on ZIKV infection and infection dynamics**

245 We observed strong, unimodal effects of temperature on the number of mosquitoes  
246 infected, with disseminated infections, and that became infectious (Table 1, Fig 1). While all  
247 three response variables dropped at both cool and warm temperatures, the extent of the decrease

248 was more pronounced as the virus spread through the mosquito (Fig 1), suggesting these traits  
 249 exhibit different thermal sensitivities. For example, the likelihood of becoming infected was the  
 250 most amenable to temperature variation, with few mosquitoes infected at 16°C (6%), maximized  
 251 from 24°C-34°C (75% - 89%), and again decreased at 38°C (7%). The likelihood of viral  
 252 dissemination was more constrained, with numbers of mosquitoes with disseminated infections  
 253 minimized at 16-20°C (4% - 3%), maximized at 28-34°C (65% - 77%), and again minimized  
 254 at 38°C (5%). Finally, the likelihood of mosquitoes becoming infectious was the most sensitive  
 255 to temperature, with the numbers of infectious mosquitoes minimized from 16-24°C (0%-  
 256 4%), maximized between 28-34°C (23%-19%), and again minimized from 36-38°C (5%-0.4%)  
 257

258 **Table 1. The effects of temperature, day, and their interaction on the numbers (out to total**  
 259 **mosquitoes exposed) of mosquitoes infected, and with disseminated infections, infectious, as**  
 260 **well as a measure of overall dissemination efficiency (of those infected, the number of**  
 261 **mosquitoes that became infectious).**

| response variables       | temperature |      |         | day    |      |         | temperature x day |      |         |
|--------------------------|-------------|------|---------|--------|------|---------|-------------------|------|---------|
|                          | F           | d.f. | p-value | F      | d.f. | p-value | F                 | d.f. | p-value |
| number infected          | 86.159      | 7    | <0.0001 | 1.349  | 6    | 0.251   | 8.374             | 42   | <0.0001 |
| number disseminated      | 139.085     | 7    | <0.0001 | 14.742 | 6    | <0.0001 | 12.477            | 42   | <0.0001 |
| number infectious        | 34.012      | 7    | <0.0001 | 8.876  | 6    | <0.0001 | 4.846             | 42   | <0.0001 |
| dissemination efficiency | 15.308      | 7    | <0.0001 | 7.699  | 6    | <0.0001 | 4.431             | 42   | <0.0001 |

262 Results from generalized linear mixed effects models examining the effects of temperature, day,  
 263 and the interaction on the numbers of mosquitoes infected, with disseminated infections,  
 264 infectiousness, and a measure of dissemination efficiency.  
 265

266 **Fig 1. Temperature effect on the proportion of mosquitoes infected, with disseminated**  
 267 **infections, and infectious.** The effect of eight different constant temperatures (16°C, 20°C,

268 24°C, 28°C, 32°C, 34°C, 36°C, 38°C) on the proportion of mosquitoes infected (ZIKV positive  
269 bodies compared to total number of exposed), with disseminated infections (ZIKV positive heads  
270 compared to total number exposed), and infectious (ZIKV positive saliva compared to total  
271 number exposed). Results with no common letters were significantly different ( $p \leq 0.05$ ).

272 We also observed that temperature had a significant effect on the rate that virus  
273 disseminated through the mosquito and could be detected in saliva (Table 1, Fig 2). In general,  
274 across most temperature treatments (with the exception of 36°C and 38°C), we observed  
275 increases in the numbers of mosquitoes with ZIKV positive bodies, legs and heads, and saliva  
276 with time (Fig 2). In contrast, we see declines in the numbers of mosquitoes infected, with  
277 disseminated infections, and that were infectious over time at the warmest temperatures, due to  
278 the higher mosquito mortality when housed at 36°C and 38°C. As the temperature increased, the  
279 time at which ZIKV was detected in the samples decreased (Fig 2 and Table 2), suggesting  
280 ZIKV infections and dissemination becomes more efficient with warming temperatures.

281

282 **Fig 2. Days post-infection and the proportion of mosquitoes infected, with disseminated**  
283 **infections, and infectious.** The relationship between days post-infection (3, 6, 9, 12, 15, 18, 21)  
284 and the proportion of mosquitoes infected (A, ZIKV positive bodies), with disseminated  
285 infections (B, ZIKV positive legs and heads), and infectious (C, ZIKV positive saliva) out of the  
286 total mosquitoes exposed to ZIKV at eight different constant temperatures (16°C, 20°C, 24°C,  
287 28°C, 32°C, 34°C, 36°C, 38°C).

288 **Table 2. The time (days post infection, dpi) required for first detection and to reach the**  
289 **plateau of numbers of mosquitoes infected, with disseminated infections, and infectious.**

| temperature                       | 16°C | 20°C | 24°C | 28°C | 32°C | 34°C | 36°C | 38°C |
|-----------------------------------|------|------|------|------|------|------|------|------|
| time (dpi) to first detection of: |      |      |      |      |      |      |      |      |
| infection                         | 12   | 6    | 3    | 3    | 3    | 3    | 3    | 3    |
| dissemination                     | 12   | 15   | 6    | 3    | 3    | 3    | 3    | 3    |
| infectiousness                    |      | 21   | 15   | 9    | 6    | 6    | 6    | 3    |
| time (dpi) to reach plateau of:   |      |      |      |      |      |      |      |      |
| infection                         | 18   | 12   | 6    | 3    | 9    | 3    | 3    | 3    |
| dissemination                     | 18   | 21   | 15   | 15   | 9    | 6    | 6    | 3    |
| infectiousness                    |      | 21   | 18   | 15   | 12   | 9    | 6    | 3    |

290

### 291 **The effects of temperature on ZIKV dissemination efficiency**

292 We observed significant effects of temperature, dpi, and the interaction on the  
 293 dissemination efficiency of ZIKV, measured as the number of mosquitoes that were successfully  
 294 infected (ZIKV-positive bodies) that in turn went on to become infectious (ZIKV-positive  
 295 saliva). ZIKV dissemination efficiency was maximized between 28 – 34°C, suggesting that  
 296 ZIKV escape from the midgut and salivary gland invasion was most efficient at these  
 297 temperatures (Fig 3A). In contrast, ZIKV dissemination efficiency was minimized at both cooler  
 298 (16 - 20°C) and warmer temperatures (38°C). Interestingly, cooler temperatures had a more  
 299 dramatic effect on ZIKV dissemination efficiency relative to warmer temperatures. For example,  
 300 although 60% of exposed mosquitoes became successfully infected at 20°C, we had very low  
 301 salivary gland invasion, with only one mosquito across both trials becoming infectious. In  
 302 contrast, at warm temperatures infection and dissemination efficiencies were very robust (Fig  
 303 S2), but the mortality associated with the warm temperatures resulted in low numbers of  
 304 mosquitoes that were capable of being infectious. Finally, of those successfully infected, we  
 305 observed successful salivary gland invasion to occur earlier in the infection process as  
 306 temperatures warmed (Fig 3B).

307

308 **Fig 3. Temperature effect on the dissemination efficiency**

309 (A) The effect of eight different constant temperatures (16°C, 20°C, 24°C, 28°C, 32°C, 34°C,  
310 36°C, 38°C) and (B) days post-infection (3, 6, 9, 12, 15, 18, 21) on the dissemination efficiency  
311 (proportion of ZIKV positive saliva relative to positive bodies). Results with no common letters  
312 were significantly different ( $p \leq 0.05$ ).

313

314 **The effect of temperature on mosquito survival**

315 We observed significant effects of temperature and an interaction between temperature  
316 and ZIKV exposure on the daily probability of mosquito survival (Fig 4, Table 3). Overall, the  
317 daily probability of mosquito survival was highest for mosquitoes housed at 24°C and 28°C  
318 relative to cooler (16 - 20°C) and warmer (32 - 38°C) temperatures. Mosquito survival was  
319 lowest at the warmest temperature of 38°C, with no mosquitoes surviving past 3 dpi. ZIKV-  
320 exposed mosquitoes experienced a higher daily probability of survival at 24°C, 28°C, and 32°C  
321 relative to unexposed, control mosquitoes with greater than 90% survival at the optimal  
322 temperatures.

323

324 **Fig 4. Temperature effects on the daily probability of mosquito survival.** Kaplan-Meier  
325 estimates of daily probability of mosquito survival for unexposed (A) and ZIKV exposed (B)  
326 field-derived *Ae. aegypti* mosquitoes across eight different constant temperatures (16°C, 20°C,  
327 24°C, 28°C, 32°C, 34°C, 36°C, 38°C).

328

329 **Table 3. The effects of temperature, ZIKV infection, and potential interaction on the daily**  
330 **probability of mosquito survival.**

| effect                  | Chi-Square | d.f. | p-value           |
|-------------------------|------------|------|-------------------|
| temperature             | 1138.226   | 7    | <b>&lt;0.0001</b> |
| infection               | 0.227      | 1    | 0.6338            |
| temperature x infection | 25.871     | 7    | <b>0.0005</b>     |

331 Results from Cox mixed-effects model examining the effects of temperature (16°C, 20°C, 24°C,  
332 28°C, 32°C, 34°C, 36°C, 38°C), infection status (exposed or not exposed) and the interaction on  
333 the daily probability of mosquito survival.

334

### 335 **The effect of temperature on ZIKV transmission risk**

336 Trait thermal responses for lifespan, vector competence, and extrinsic incubation rate  
337 were all unimodal (Fig 5). Mosquito lifespan and vector competence thermal responses were  
338 symmetrical, peaking at 24.2°C (95% CI: 21.9 – 25.9°C) and 30.6°C (95% CI: 29.6 – 31.4°C),  
339 respectively, while the extrinsic incubation rate thermal response was asymmetrical with a peak  
340 at 36.4°C (95% CI: 33.6 – 39.1°C). Applying these new trait thermal responses to the  $R_0(T)$   
341 model [14], we found that  $R_0(T)$  peaked at 28.9°C (95% CI: 28.1 – 29.5°C), with lower and  
342 upper limits of 22.7°C (95% CI: 21.0 – 23.9°C) and 34.7°C (95% CI: 34.1 – 35.8°C),  
343 respectively (Fig 6).

344

345 **Fig 5. Effect of temperature and estimated vector competence, extrinsic incubation rate**  
346 **and mosquito lifespan.** Trait thermal responses, fit from laboratory experimental data. Vector  
347 competence (left), is the maximum proportion of virus-exposed mosquitoes with virus in their  
348 saliva, across temperatures and replicates. Extrinsic incubation rate (middle) is the inverse of the



349 time required to reach half of the maximum proportion infectious ( $\text{days}^{-1}$ ) for each temperature  
350 and replicate. Lifespan is the average lifespan of mosquitoes in each temperature and replicate  
351 (days), shown in filled (virus-exposed) and open (sham-inoculated) points. Solid lines represent  
352 posterior means; dashed lines represent 95% credible intervals.

353

354 **Fig 6. Effect of temperature on  $R_0$ .** Effect of temperature on  $R_0$  (top) and histograms showing  
355 the posterior distribution of the temperature minimum (bottom left), optimum (bottom center),  
356 and maximum (bottom right) for  $R_0$ . Solid line is the mean and dashed lines are the 95% credible  
357 intervals.

358

359 While there is some evidence that mosquito longevity varies for virus-exposed versus  
360 control mosquitoes, where unexposed mosquitoes had shorter lifespans at near-optimal  
361 temperatures (24°C and 28°C; Fig 5), we did not include this difference in the  $R_0$  model for two  
362 reasons. First, with limited data to parameterize the low temperature range for survival, we are  
363 unable to characterize the differences in the lower end of the thermal response functions in detail.  
364 Second, the standard  $R_0$  model does not incorporate differences in survival for infected versus  
365 uninfected mosquitoes because it assumes that the pathogen is rare and that all mosquitoes are  
366 uninfected. For this reason, we fit a single thermal response function for lifespan to the full  
367 dataset and used it in the  $R_0$  model.

368

## 369 **Discussion**

370           The dynamics and distribution of vector-borne diseases depend on the interplay between  
371 the pathogen, the mosquito, and the environment [33]. Temperature is a strong driver of vector-  
372 borne disease transmission, and characterizing the thermal range and optimum for transmission  
373 is essential for accurately predicting how arbovirus emergence and transmission will be affected  
374 by seasonality, geography, climate and land use change. Yet current models of recently emerging  
375 arboviruses (e.g. CHIKV [26, 34] and ZIKV [10, 27, 35, 36]) are constrained by a lack of data on  
376 the thermal sensitivity of key pathogen traits. In this study, we experimentally estimated the  
377 relationship between temperature and measures of ZIKV vector competence, extrinsic incubation  
378 rate, and mosquito mortality. By incorporating these temperature-trait relationships into an  
379 existing mechanistic model, we demonstrate that like malaria [21, 30] and dengue virus [14],  
380 ZIKV transmission also has a strong unimodal relationship with temperature.

381           The effect of temperature on ZIKV transmission is shaped by the complex interaction of  
382 individual trait responses of the mosquito and the pathogen with temperature. As studies have  
383 demonstrated in other arbovirus systems, temperature significantly affects vector competence  
384 [14, 22, 23, 37-42]. We show that temperature has a unimodal relationship with vector  
385 competence with an estimated optimum at 30.6°C and an estimated thermal minimum and  
386 maximum of 22.9°C and 38.4°C, respectively (based on posterior median estimates for  $T_0$  and  
387  $T_m$ ). ZIKV infection was limited by different mechanisms at the thermal minimum and  
388 maximum. Cool temperatures limited midgut escape and dissemination resulting in a lower  
389 proportion of the mosquito population that was infectious. This could be due to temperature  
390 effects on mosquito physiology [43], immunity [18, 44-47], and viral binding to specific  
391 receptors in the midgut, secondary tissues, and salivary glands [48]. Warmer temperatures, on

392 the other hand, were very permissive for ZIKV infection, resulting in 95% and 100% infection  
393 among surviving mosquitoes at 36°C and 38°C, respectively (S2 Fig). However, high mosquito  
394 mortality resulted in an overall low proportion of the mosquito population becoming infected and  
395 infectious. A similar nonlinear effect of cool and warm temperatures on vector competence was  
396 observed with *Ae. albopictus* infected with DENV2 [42]. In contrast, Adelman et al. [19]  
397 demonstrated that cooler temperatures resulted in increased susceptibility to chikungunya and  
398 yellow fever virus due to impairment of the RNAi pathway. However, we only exposed adult  
399 mosquitoes to varying mean temperatures, while Adelman et al. [19] looked at the carry-over  
400 effects of larval rearing temperature. Both larval and adult temperature variation will likely be  
401 important in the field in determining temperature effects on mosquito and pathogen traits  
402 comprising arbovirus transmission.

403 We also observed an asymmetrical unimodal relationship between temperature and the  
404 extrinsic incubation rate of ZIKV, with the extrinsic incubation rate optimized at 36.4°C and  
405 minimized at 19.7°C and 42.5°C (based on posterior median estimates for  $T_0$  and  $T_m$ ). The effects  
406 of temperature on the extrinsic incubation periods of arboviruses and other mosquito pathogens  
407 have been extensively studied (dengue virus [42, 49, 50], yellow fever virus [23], West Nile  
408 virus [22], chikungunya virus [51], and malaria [52, 53]). Consistent with previous studies, we  
409 show that the extrinsic incubation rate of ZIKV increased with warming temperatures, with no  
410 infectious mosquitoes observed at 16°C after 21 days post infection and the first infectious  
411 mosquito detected at day 3 post infection at 38°C. The extrinsic incubation rate was ultimately  
412 constrained at the warmer temperatures due to high mosquito mortality. This is not surprising as  
413 metabolic reaction rates tend to increase exponentially to an optimal temperature, then decline  
414 rapidly due to protein degradation and other processes [54-56].

415           The optimal temperature for mosquito fitness and viral dissemination need not be  
416 equivalent, and the impacts of temperature on mosquito mortality relative to the extrinsic  
417 incubation rate of arboviruses can have important implications for the total proportion of the  
418 mosquito population that is alive and infectious [52, 57]. In our study, mosquito lifespan was  
419 optimized at 24.2°C and minimized at 11.7°C and 37.2°C, respectively (based on posterior  
420 median estimates for  $T_0$  and  $T_m$ ). The non-linear relationship between metrics of mosquito  
421 mortality or lifespan and temperature has also been demonstrated for *Ae. aegypti* [14], *Ae.*  
422 *albopictus* [14, 20] and various *Anopheles* spp. [21, 53]. Despite the fact that the extrinsic  
423 incubation period was optimized at a warm temperature (36.4°C), the optimal temperature for  
424 overall ZIKV transmission ( $R_0$ ) was predicted to be cooler (28.9°C) because mosquitoes have a  
425 significantly shortened lifespan above 32°C. In contrast, even though mosquitoes are predicted to  
426 have relatively longer lifespans at cooler temperatures, the time required for mosquitoes to  
427 become infectious (>21 days at 16°C and 18 days at 20°C) may be longer than most mosquitoes  
428 experience in the field. As a result, large vector populations may not be sufficient for  
429 transmitting the virus if viral replication is inhibited or if the lifespan of the mosquito is shorter  
430 than the extrinsic incubation period [58]. One surprising result was that mosquitoes exposed to  
431 ZIKV were predicted to live significantly longer at temperatures that optimized mosquito  
432 survival as compared to unexposed mosquitoes (37 vs. 87 days at 24°C; 45 vs. 54 days at 28°C).  
433 Additionally, the temperature that optimizes mosquito lifespan might also vary between ZIKV  
434 exposed mosquitoes (24°C) and their uninfected counterparts (28°C). If similar trends hold for  
435 other arbovirus systems, current modeling efforts may be underestimating virus transmission  
436 potential under certain environmental scenarios. If a survival benefit of virus exposure regularly  
437 occurs at optimal temperatures across arbovirus systems, estimating mosquito mortality in the

438 field for mosquitoes of different infection statuses and the physiological underpinnings of this  
439 response are important areas for future research.

440 After incorporating the relationships between temperature and vector competence, the  
441 extrinsic incubation rate, and mosquito lifespan into a mechanistic model, we demonstrated that  
442 ZIKV transmission is optimized at a mean temperature of approximately 29°C, and has a thermal  
443 range of 22.7°C to 34.7°C. Because this relationship is nonlinear and unimodal, we can expect as  
444 temperatures move toward the thermal optimum due to future climate change or increasing  
445 urbanization [59], environmental suitability for ZIKV transmission should increase, potentially  
446 resulting in expansion of ZIKV further north and into longer seasons. There is evidence that this  
447 is already occurring with warming at high elevations in the Ethiopian and Columbian highlands  
448 leading to increased incidence of malaria [16]. In contrast, in areas that are already permissive  
449 and near the thermal optimum for ZIKV transmission, future warming and urbanization may lead  
450 to decreases in overall environmental suitability [24]. Accurately estimating the optimal  
451 temperature for transmission is thus paramount for predicting where climate warming will  
452 expand, contract, or shift transmission potential.

453 By using a mechanistic model originally parameterized for DENV, we also explored a  
454 common assumption made by multiple models that DENV transmission has a similar  
455 relationship with temperature as ZIKV [10, 14, 27, 35, 36]. While the temperature optimum and  
456 maximum for  $R_0$  changed very little from our previous DENV  $R_0$  model, the temperature  
457 minimum for transmission increased by nearly five degrees in the updated model (S3 Fig). This  
458 is mainly due to a higher thermal minimum for both vector competence and the extrinsic  
459 incubation rate for ZIKV as compared to DENV (S3 Fig [14]). The reason for this difference  
460 could be because DENV has a different thermal niche than ZIKV, or alternatively, our field

461 derived *Ae. aegypti* could have a different thermal niche than the *Ae. aegypti* populations  
462 assessed in Mordecai et al. [14]. There is evidence in a range of invertebrate-pathogen systems  
463 (spanning fruit flies, *Daphnia*, pea aphids, and mosquitoes [41, 60-63]) that the effects of  
464 environmental variation on disease transmission are often modified by the genetic background of  
465 the host and infecting pathogen [64-66]. Thus, more work is required to validate the  
466 generalizability of these models, and the mechanisms underpinning temperature effects on  
467 mosquito-virus interactions and temperature-transmission relationships. However, if the higher  
468 thermal minimum for ZIKV is universal, it would suggest that mechanistic and statistical  
469 modeling efforts to map the global environmental suitability for ZIKV transmission currently  
470 and with future climate change are potentially over-predicting its possible range [10, 14, 36].

471 Finally, although we estimated the effects of mean constant temperatures on mosquito  
472 and pathogen traits that integrate to shape ZIKV transmission, mosquitoes and their pathogens  
473 live in a variable world where temperatures fluctuate daily and seasonally. The values for these  
474 traits and transmission potential have been shown to differ in fluctuating environments relative to  
475 constant temperature environments [24, 67-71]. While characterizing trait responses to mean  
476 constant temperatures and incorporating these relationships into models of disease transmission  
477 is tractable, more effort is needed in validating computational approaches to infer transmission in  
478 a fluctuating environment (i.e. rate summation [14, 72]).

479 Accurately and precisely predicting arbovirus transmission will likely be influenced by  
480 variation in other sources of abiotic (e.g. relative humidity, rainfall), biotic (e.g. availability and  
481 quality of oviposition and resting habitats), and socioeconomic factors that influence human  
482 exposure to biting mosquitoes. This is a fundamental first step for empirically defining and  
483 validating current models on the environmental suitability for ZIKV transmission, in which

484 temperature will be a strong driver. Understanding the unimodal effect of temperature on  
485 emerging arboviruses, like ZIKV, will contribute to accurate predictions about how climate  
486 change and shifts in mosquito relevant microclimate with land use change could impact the risk  
487 of arbovirus emergence and transmission.  $R_0$  models have been used as a tool to guide vector-  
488 borne disease interventions, and is a comprehensive metric of pathogen fitness. We anticipate as  
489 with other vector-borne diseases [14, 21, 30] that environmental suitability for ZIKV  
490 transmission could expand northwards with future warming, but will be more constrained at low  
491 temperatures than DENV. We also predict areas that are already at or near the thermal optimum  
492 of 29°C to experience a decrease in environmental suitability for ZIKV transmission [21, 24].  
493 Further, land use change that modifies the microclimates mosquitoes experience could have  
494 immediate impacts on ZIKV transmission [59], which might explain the explosive spread of  
495 ZIKV in urban centers throughout the Americas.

496

## 497 **Acknowledgments**

498 We thank the University of Texas Medical Branch Arbovirus Reference Collection for  
499 providing the virus. We thank Dr. Américo Rodríguez from the Instituto Nacional de Salud  
500 Pública for providing mosquito eggs. We gratefully acknowledge the members of the Murdock  
501 and Brindley labs for thoughtful comments on the project and manuscript. This study was  
502 supported by the National Science Foundation, Grants for Rapid Response Research (NSF-  
503 RAPID) 1640780. Erin A. Mordecai was supported by NSF DEB-1518681 and the Stanford  
504 University Woods Institute for the Environment Environmental Ventures Program. Any  
505 opinions, findings, and conclusions or recommendations expressed in this material are those of  
506 the authors and do not necessarily reflect the views of the National Science Foundation.

## 507 **References**

- 508 1. Brady OJ, Gething PW, Bhatt S, Messina JP, Brownstein JS, Hoen AG, et al. Refining  
509 the global spatial limits of dengue virus transmission by evidence-based consensus. *PLoS Negl*  
510 *Trop Dis.* 2012;6(8):e1760. Epub 2012/08/11. doi: 10.1371/journal.pntd.0001760. PubMed  
511 PMID: 22880140; PubMed Central PMCID: PMC3413714.
- 512 2. Bhatt S, Gething PW, Brady OJ, Messina JP, Farlow AW, Moyes CL, et al. The global  
513 distribution and burden of dengue. *Nature.* 2013;496(7446):504-7. Epub 2013/04/09. doi:  
514 10.1038/nature12060. PubMed PMID: 23563266; PubMed Central PMCID: PMC3651993.
- 515 3. PAHO. Pan American Health Organisation 2018 [cited 2018 January 15]. Available  
516 from: <http://www.paho.org/>.
- 517 4. Cao-Lormeau V-M, Blake A, Mons S, Lastère S, Roche C, Vanhomwegen J, et al.  
518 Guillain-Barre Syndrome outbreak associated with Zika virus infection in French Polynesia: a  
519 case-control study. *Lancet.* 2016;387(10027):1531-9. doi: 10.1016/S0140-6736(16)00562-6.
- 520 5. Mlakar J, Korva M, Tul N, Popovic M, Poljsak-Prijatelj M, Mraz J, et al. Zika virus  
521 associated with microcephaly. *N Engl J Med.* 2016;374(10):951-8. Epub 2016/02/11. doi:  
522 10.1056/NEJMoa1600651. PubMed PMID: 26862926.
- 523 6. World Health Organization. WHO statement on the first meeting of the International  
524 Health Regulations (2005) (IHR 2005) Emergency Committee on Zika virus and observed  
525 increase in neurological disorders and neonatal malformations 2016 [cited 2017 July 19].  
526 Available from: [http://www.who.int/mediacentre/news/statements/2016/1st-emergency-](http://www.who.int/mediacentre/news/statements/2016/1st-emergency-committee-zika/en/)  
527 [committee-zika/en/](http://www.who.int/mediacentre/news/statements/2016/1st-emergency-committee-zika/en/).



- 528 7. Shragai T, Tesla B, Murdock C, Harrington LC. Zika and chikungunya: mosquito-borne  
529 viruses in a changing world. *Ann N Y Acad Sci.* 2017;1399(1):61-77. doi: 10.1111/nyas.13306.  
530 PubMed PMID: 28187236.
- 531 8. Rocklov J, Quam MB, Sudre B, German M, Kraemer MUG, Brady O, et al. Assessing  
532 Seasonal Risks for the Introduction and Mosquito-borne Spread of Zika Virus in Europe.  
533 *EBioMedicine.* 2016;9:250-6. Epub 2016/06/28. doi: 10.1016/j.ebiom.2016.06.009. PubMed  
534 PMID: 27344225; PubMed Central PMCID: PMC4972550.
- 535 9. Liu-Helmerson J, Stenlund H, Wilder-Smith A, Rocklov J. Vectorial capacity of *Aedes*  
536 *aegypti*: effects of temperature and implications for global dengue epidemic potential. *PLoS One.*  
537 2014;9(3):e89783. Epub 2014/03/08. doi: 10.1371/journal.pone.0089783. PubMed PMID:  
538 24603439; PubMed Central PMCID: PMC3946027.
- 539 10. Messina JP, Kraemer MU, Brady OJ, Pigott DM, Shearer FM, Weiss DJ, et al. Mapping  
540 global environmental suitability for Zika virus. *eLife.* 2016;5. Epub 2016/04/20. doi:  
541 10.7554/eLife.15272. PubMed PMID: 27090089; PubMed Central PMCID: PMC4889326.
- 542 11. Morin CW, Monaghan AJ, Hayden MH, Barrera R, Ernst K. Meteorologically Driven  
543 Simulations of Dengue Epidemics in San Juan, PR. *PLoS Negl Trop Dis.* 2015;9(8):e0004002.  
544 Epub 2015/08/15. doi: 10.1371/journal.pntd.0004002. PubMed PMID: 26275146; PubMed  
545 Central PMCID: PMC4537107.
- 546 12. Gething PW, Van Boeckel TP, Smith DL, Guerra CA, Patil AP, Snow RW, et al.  
547 Modelling the global constraints of temperature on transmission of *Plasmodium falciparum* and  
548 *P. vivax*. *Parasit Vectors.* 2011;4:92. Epub 2011/05/28. doi: 10.1186/1756-3305-4-92. PubMed  
549 PMID: 21615906; PubMed Central PMCID: PMC3115897.

- 550 13. Hay SI, Cox J, Rogers DJ, Randolph SE, Stern DI, Shanks GD, et al. Climate change and  
551 the resurgence of malaria in the East African highlands. *Nature*. 2002;415(6874):905-9. Epub  
552 2002/02/23. doi: 10.1038/415905a. PubMed PMID: 11859368; PubMed Central PMCID:  
553 PMCPMC3164800.
- 554 14. Mordecai E, Cohen J, Evans MV, Gudapati P, Johnson LR, Lippi CA, et al. Detecting the  
555 impact of temperature on transmission of Zika, dengue, and chikungunya using mechanistic  
556 models. *PLoS Neglected Tropical Diseases*. 2017;11(4):e0005568. doi:  
557 <https://doi.org/10.1371/journal.pntd.0005568>.
- 558 15. Ryan SJ, McNally A, Johnson LR, Mordecai EA, Ben-Horin T, Paaijmans K, et al.  
559 Mapping Physiological Suitability Limits for Malaria in Africa Under Climate Change. *Vector  
560 Borne Zoonotic Dis*. 2015;15(12):718-25. Epub 2015/11/19. doi: 10.1089/vbz.2015.1822.  
561 PubMed PMID: 26579951; PubMed Central PMCID: PMCPMC4700390.
- 562 16. Siraj AS, Santos-Vega M, Bouma MJ, Yadeta D, Carrascal DR, Pascual M. Altitudinal  
563 changes in malaria incidence in highlands of Ethiopia and Colombia. *Science*.  
564 2014;343(6175):1154-8. doi: 10.1126/science.1244325.
- 565 17. Murdock CC, Moller-Jacobs LL, Thomas MB. Complex environmental drivers of  
566 immunity and resistance in malaria mosquitoes. *Proc Biol Sci*. 2013;280(1770):20132030. Epub  
567 2013/09/21. doi: 10.1098/rspb.2013.2030. PubMed PMID: 24048159; PubMed Central PMCID:  
568 PMCPMC3779341.
- 569 18. Murdock CC, Paaijmans KP, Bell AS, King JG, Hillyer JF, Read AF, et al. Complex  
570 effects of temperature on mosquito immune function. *Proc Biol Sci*. 2012;279(1741):3357-66.  
571 Epub 2012/05/18. doi: 10.1098/rspb.2012.0638. PubMed PMID: 22593107; PubMed Central  
572 PMCID: PMCPMC3385736.

- 573 19. Adelman ZN, Anderson MA, Wiley MR, Murreddu MG, Samuel GH, Morazzani EM, et  
574 al. Cooler temperatures destabilize RNA interference and increase susceptibility of disease  
575 vector mosquitoes to viral infection. *PLoS Negl Trop Dis*. 2013;7(5):e2239. Epub 2013/06/06.  
576 doi: 10.1371/journal.pntd.0002239. PubMed PMID: 23738025; PubMed Central PMCID:  
577 PMCPMC3667787.
- 578 20. Delatte H, Gimonneau G, Triboire A, Fontenille D. Influence of temperature on immature  
579 development, survival, longevity, fecundity, and gonotrophic cycles of *Aedes albopictus*, vector  
580 of chikungunya and dengue in the Indian Ocean. *J Med Entomol*. 2009;46(1):33-41. Epub  
581 2009/02/10. PubMed PMID: 19198515.
- 582 21. Mordecai EA, Paaijmans KP, Johnson LR, Balzer C, Ben-Horin T, de Moor E, et al.  
583 Optimal temperature for malaria transmission is dramatically lower than previously predicted.  
584 *Ecol Lett*. 2013;16(1):22-30. Epub 2012/10/12. doi: 10.1111/ele.12015. PubMed PMID:  
585 23050931.
- 586 22. Kilpatrick AM, Meola MA, Moudy RM, Kramer LD. Temperature, viral genetics, and  
587 the transmission of West Nile virus by *Culex pipiens* mosquitoes. *PLoS Pathog*.  
588 2008;4(6):e1000092. Epub 2008/06/28. doi: 10.1371/journal.ppat.1000092. PubMed PMID:  
589 18584026; PubMed Central PMCID: PMCPMC2430533.
- 590 23. Johansson MA, Arana-Vizcarrondo N, Biggerstaff BJ, Staples JE. Incubation periods of  
591 Yellow fever virus. *Am J Trop Med Hyg*. 2010;83(1):183-8. Epub 2010/07/03. doi:  
592 10.4269/ajtmh.2010.09-0782. PubMed PMID: 20595499; PubMed Central PMCID:  
593 PMCPMC2912597.

- 594 24. Murdock CC, Sternberg ED, Thomas MB. Malaria transmission potential could be  
595 reduced with current and future climate change. *Sci Rep.* 2016;6:27771. Epub 2016/06/22. doi:  
596 10.1038/srep27771. PubMed PMID: 27324146; PubMed Central PMCID: PMC4914975.
- 597 25. Ruiz-Moreno D, Vargas IS, Olson KE, Harrington LC. Modeling dynamic introduction  
598 of Chikungunya virus in the United States. *PLoS Negl Trop Dis.* 2012;6(11):e1918. Epub  
599 2012/12/05. doi: 10.1371/journal.pntd.0001918. PubMed PMID: 23209859; PubMed Central  
600 PMCID: PMC3510155.
- 601 26. Johansson MA, Powers AM, Pesik N, Cohen NJ, Staples JE. Nowcasting the spread of  
602 chikungunya virus in the Americas. *PLoS One.* 2014;9(8):e104915. Epub 2014/08/12. doi:  
603 10.1371/journal.pone.0104915. PubMed PMID: 25111394; PubMed Central PMCID:  
604 PMC4128737.
- 605 27. Caminade C, Turner J, Metelmann S, Hesson JC, Blagrove MS, Solomon T, et al. Global  
606 risk model for vector-borne transmission of Zika virus reveals the role of El Nino 2015. *Proc*  
607 *Natl Acad Sci U S A.* 2017;114(1):119-24. Epub 2016/12/21. doi: 10.1073/pnas.1614303114.  
608 PubMed PMID: 27994145; PubMed Central PMCID: PMC5224381.
- 609 28. Willard KA, Demakovskiy L, Tesla B, Goodfellow FT, Stice SL, Murdock CC, et al. Zika  
610 Virus Exhibits Lineage-Specific Phenotypes in Cell Culture, in *Aedes aegypti* Mosquitoes, and  
611 in an Embryo Model. *Viruses.* 2017;9(12). Epub 2017/12/21. doi: 10.3390/v9120383. PubMed  
612 PMID: 29258204; PubMed Central PMCID: PMC5744157.
- 613 29. R Core Team. *R: A language and environment for statistical computing.* Vienna, Austria:  
614 R Foundation for Statistical Computing; 2017.

- 615 30. Johnson LR, Ben-Horin T, Lafferty KD, McNally A, Mordecai E, Paaijmans KP, et al.  
616 Understanding uncertainty in temperature effects on vector-borne disease: a Bayesian approach.  
617 Ecology. 2015;96(1):203-13. Epub 2015/08/04. PubMed PMID: 26236905.
- 618 31. Plummer M, editor JAGS: A program for analysis of Bayesian graphical models using  
619 Gibbs sampling. Proceedings of the 3rd International Workshop on Distributed Statistical  
620 Computing; 2003; Vienna, Austria.
- 621 32. Plummer M. rjags: Bayesian Graphical Models using MCMC. R package version 4-6.  
622 2016.
- 623 33. Parham PE, Waldock J, Christophides GK, Hemming D, Agosto F, Evans KJ, et al.  
624 Climate, environmental and socio-economic change: weighing up the balance in vector-borne  
625 disease transmission. Philos Trans R Soc Lond B Biol Sci. 2015;370(1665):20130551. doi:  
626 10.1098/rstb.2013.0551. PubMed PMID: PMC4342957.
- 627 34. Nsoesie EO, Kraemer MU, Golding N, Pigott DM, Brady OJ, Moyes CL, et al. Global  
628 distribution and environmental suitability for chikungunya virus, 1952 to 2015. Euro Surveill.  
629 2016;21(20):10.2807/1560-7917.ES.2016.21.20.30234. doi: 10.2807/1560-  
630 7917.ES.2016.21.20.30234. PubMed PMID: PMC4902126.
- 631 35. Bogoch, II, Brady OJ, Kraemer MUG, German M, Creatore MI, Kulkarni MA, et al.  
632 Anticipating the international spread of Zika virus from Brazil. Lancet. 2016;387(10016):335-6.  
633 Epub 2016/01/19. doi: 10.1016/s0140-6736(16)00080-5. PubMed PMID: 26777915; PubMed  
634 Central PMCID: PMC4873159.
- 635 36. Samy AM, Thomas SM, Wahed AA, Cohoon KP, Peterson AT. Mapping the global  
636 geographic potential of Zika virus spread. Mem Inst Oswaldo Cruz. 2016;111(9):559-60. Epub

- 637 2016/09/23. doi: 10.1590/0074-02760160149. PubMed PMID: 27653360; PubMed Central  
638 PMCID: PMCPMC5027865.
- 639 37. Alto BW, Bettinardi D. Temperature and dengue virus infection in mosquitoes:  
640 independent effects on the immature and adult stages. *Am J Trop Med Hyg.* 2013;88(3):497-505.  
641 Epub 2013/02/06. doi: 10.4269/ajtmh.12-0421. PubMed PMID: 23382163; PubMed Central  
642 PMCID: PMCPMC3592531.
- 643 38. Thu HM, Aye KM, Thein S. The effect of temperature and humidity on dengue virus  
644 propagation in *Aedes aegypti* mosquitos. *Southeast Asian J Trop Med Public Health.*  
645 1998;29(2):280-4. Epub 1999/01/14. PubMed PMID: 9886113.
- 646 39. Watts DM, Burke DS, Harrison BA, Whitmire RE, Nisalak A. Effect of temperature on  
647 the vector efficiency of *Aedes aegypti* for dengue 2 virus. *Am J Trop Med Hyg.* 1987;36(1):143-  
648 52. Epub 1987/01/01. PubMed PMID: 3812879.
- 649 40. McLean DM, Clarke AM, Coleman JC, Montalbe.Ca, Skidmore AG, Walters TE, et al.  
650 Vector capability of *Aedes aegypti* mosquitoes for California encephalitis and dengue viruses at  
651 various temperatures. *Canadian Journal of Microbiology.* 1974;20(2):255-&. PubMed PMID:  
652 WOS:A1974S425700024.
- 653 41. Zouache K, Fontaine A, Vega-Rua A, Mousson L, Thiberge JM, Lourenco-De-Oliveira  
654 R, et al. Three-way interactions between mosquito population, viral strain and temperature  
655 underlying chikungunya virus transmission potential. *Proc Biol Sci.* 2014;281(1792). Epub  
656 2014/08/15. doi: 10.1098/rspb.2014.1078. PubMed PMID: 25122228; PubMed Central PMCID:  
657 PMCPMC4150320.
- 658 42. Xiao FZ, Zhang Y, Deng YQ, He S, Xie HG, Zhou XN, et al. The effect of temperature  
659 on the extrinsic incubation period and infection rate of dengue virus serotype 2 infection in

- 660 *Aedes albopictus*. Arch Virol. 2014;159(11):3053-7. Epub 2014/07/06. doi: 10.1007/s00705-  
661 014-2051-1. PubMed PMID: 24990415.
- 662 43. Houk EJ, Obie F, Hardy JL. Peritrophic membrane formation and the midgut barrier to  
663 arboviral infection in the mosquito, *Culex tarsalis* Coquillett (Insecta, Diptera). Acta Trop.  
664 1979;36(1):39-45. Epub 1979/03/01. PubMed PMID: 35932.
- 665 44. Murdock CC, Paaijmans KP, Cox-Foster D, Read AF, Thomas MB. Rethinking vector  
666 immunology: the role of environmental temperature in shaping resistance. Nat Rev Microbiol.  
667 2012;10(12):869-76. Epub 2012/11/14. doi: 10.1038/nrmicro2900. PubMed PMID: 23147703;  
668 PubMed Central PMCID: PMC4142813.
- 669 45. McFarlane M, Arias-Goeta C, Martin E, O'Hara Z, Lulla A, Mousson L, et al.  
670 Characterization of *Aedes aegypti* innate-immune pathways that limit Chikungunya virus  
671 replication. PLoS Negl Trop Dis. 2014;8(7):e2994. Epub 2014/07/25. doi:  
672 10.1371/journal.pntd.0002994. PubMed PMID: 25058001; PubMed Central PMCID:  
673 PMC4109886.
- 674 46. Merklings SH, van Rij RP. Beyond RNAi: antiviral defense strategies in *Drosophila* and  
675 mosquito. J Insect Physiol. 2013;59(2):159-70. Epub 2012/07/25. doi:  
676 10.1016/j.jinsphys.2012.07.004. PubMed PMID: 22824741.
- 677 47. Khoo CC, Piper J, Sanchez-Vargas I, Olson KE, Franz AW. The RNA interference  
678 pathway affects midgut infection- and escape barriers for Sindbis virus in *Aedes aegypti*. BMC  
679 Microbiol. 2010;10:130. Epub 2010/04/30. doi: 10.1186/1471-2180-10-130. PubMed PMID:  
680 20426860; PubMed Central PMCID: PMC4109886.

- 681 48. Franz AW, Kantor AM, Passarelli AL, Clem RJ. Tissue Barriers to Arbovirus Infection  
682 in Mosquitoes. *Viruses*. 2015;7(7):3741-67. Epub 2015/07/18. doi: 10.3390/v7072795. PubMed  
683 PMID: 26184281; PubMed Central PMCID: PMC4517124.
- 684 49. Rohani A, Wong YC, Zamre I, Lee HL, Zurainee MN. The effect of extrinsic incubation  
685 temperature on development of dengue serotype 2 and 4 viruses in *Aedes aegypti* (L.). *Southeast  
686 Asian J Trop Med Public Health*. 2009;40(5):942-50. Epub 2009/10/22. PubMed PMID:  
687 19842378.
- 688 50. Chan M, Johansson MA. The incubation periods of Dengue viruses. *PLoS One*.  
689 2012;7(11):e50972. Epub 2012/12/12. doi: 10.1371/journal.pone.0050972. PubMed PMID:  
690 23226436; PubMed Central PMCID: PMC3511440.
- 691 51. Christofferson RC, Chisenhall DM, Wearing HJ, Mores CN. Chikungunya viral fitness  
692 measures within the vector and subsequent transmission potential. *PLoS One*.  
693 2014;9(10):e110538. Epub 2014/10/14. doi: 10.1371/journal.pone.0110538. PubMed PMID:  
694 25310016; PubMed Central PMCID: PMC4195746.
- 695 52. Shapiro LLM, Whitehead SA, Thomas MB. Quantifying the effects of temperature on  
696 mosquito and parasite traits that determine the transmission potential of human malaria. *PLoS  
697 Biol*. 2017;15(10):e2003489. Epub 2017/10/17. doi: 10.1371/journal.pbio.2003489. PubMed  
698 PMID: 29036170; PubMed Central PMCID: PMC5658182.
- 699 53. Paaijmans KP, Blanford S, Chan BH, Thomas MB. Warmer temperatures reduce the  
700 vectorial capacity of malaria mosquitoes. *Biol Lett*. 2012;8(3):465-8. Epub 2011/12/23. doi:  
701 10.1098/rsbl.2011.1075. PubMed PMID: 22188673; PubMed Central PMCID:  
702 PMC3367745.



- 703 54. Dell AI, Pawar S, Savage VM. The thermal dependence of biological traits. *Ecology*.  
704 2013;94(5):1205-6. doi: 10.1890/12-2060.1.
- 705 55. Dell AI, Pawar S, Savage VM. Systematic variation in the temperature dependence of  
706 physiological and ecological traits. *Proc Natl Acad Sci U S A*. 2011;108(26):10591-6. Epub  
707 2011/05/25. doi: 10.1073/pnas.1015178108. PubMed PMID: 21606358; PubMed Central  
708 PMCID: PMC3127911.
- 709 56. Johnson FH, Eyring H, Stover BJ. *The Theory of Rate Processes in Biology and*  
710 *Medicine*. Eyring H, Stover BJ, editors. New York: Wiley; 1974.
- 711 57. Brady OJ, Godfray HC, Tatem AJ, Gething PW, Cohen JM, McKenzie FE, et al. Adult  
712 vector control, mosquito ecology and malaria transmission. *Int Health*. 2015;7(2):121-9. Epub  
713 2015/03/04. doi: 10.1093/inthealth/ihv010. PubMed PMID: 25733562; PubMed Central PMCID:  
714 PMC4357799.
- 715 58. Morin CW, Comrie AC, Ernst K. Climate and Dengue Transmission: Evidence and  
716 Implications. *Environ Health Perspect*. 2013;121(11-12):1264-72. doi: 10.1289/ehp.1306556.  
717 PubMed PMID: PMC3855512.
- 718 59. Murdock CC, Evans MV, McClanahan TD, Miazgowiec KL, Tesla B. Fine-scale  
719 variation in microclimate across an urban landscape shapes variation in mosquito population  
720 dynamics and the potential of *Aedes albopictus* to transmit arboviral disease. *PLoS Negl Trop*  
721 *Dis*. 2017;11(5):e0005640. Epub 2017/05/31. doi: 10.1371/journal.pntd.0005640. PubMed  
722 PMID: 28558030; PubMed Central PMCID: PMC5466343.
- 723 60. Stacey DA, Thomas MB, Blanford S, Pell JK, Pugh C, Fellowes MDE. Genotype and  
724 temperature influence pea aphid resistance to a fungal entomopathogen. *Physiol Entomol*.  
725 2003;28(2):75-81. doi: 10.1046/j.1365-3032.2003.00309.x.

- 726 61. Vale PF, Stjernman M, Little TJ. Temperature-dependent costs of parasitism and  
727 maintenance of polymorphism under genotype-by-environment interactions. *J Evol Biol.*  
728 2008;21(5):1418-27. Epub 2008/06/19. doi: 10.1111/j.1420-9101.2008.01555.x. PubMed PMID:  
729 18557795.
- 730 62. Lazzaro BP, Flores HA, Lorigan JG, Yourth CP. Genotype-by-environment interactions  
731 and adaptation to local temperature affect immunity and fecundity in *Drosophila melanogaster*.  
732 *PLoS Pathog.* 2008;4(3):e1000025. Epub 2008/03/29. doi: 10.1371/journal.ppat.1000025.  
733 PubMed PMID: 18369474; PubMed Central PMCID: PMCPMC2265416.
- 734 63. Gloria-Soria A, Armstrong PM, Powell JR, Turner PE. Infection rate of *Aedes aegypti*  
735 mosquitoes with dengue virus depends on the interaction between temperature and mosquito  
736 genotype. *Proc Biol Sci.* 2017;284(1864). Epub 2017/10/06. doi: 10.1098/rspb.2017.1506.  
737 PubMed PMID: 28978730; PubMed Central PMCID: PMCPMC5647301.
- 738 64. Christofferson RC. Zika Virus Emergence and Expansion: Lessons Learned from Dengue  
739 and Chikungunya May Not Provide All the Answers. *Am J Trop Med Hyg.* 2016;95(1):15-8.  
740 Epub 2016/02/24. doi: 10.4269/ajtmh.15-0866. PubMed PMID: 26903610; PubMed Central  
741 PMCID: PMCPMC4944680.
- 742 65. Lambrechts L, Quillery E, Noel V, Richardson JH, Jarman RG, Scott TW, et al.  
743 Specificity of resistance to dengue virus isolates is associated with genotypes of the mosquito  
744 antiviral gene *Dicer-2*. *Proc Biol Sci.* 2013;280(1751):20122437. Epub 2012/11/30. doi:  
745 10.1098/rspb.2012.2437. PubMed PMID: 23193131; PubMed Central PMCID:  
746 PMCPMC3574411.
- 747 66. Chouin-Carneiro T, Vega-Rua A, Vazeille M, Yebakima A, Girod R, Goindin D, et al.  
748 Differential susceptibilities of *Aedes aegypti* and *Aedes albopictus* from the Americas to Zika

- 749 virus. PLoS Negl Trop Dis. 2016;10(3):e0004543. doi: 10.1371/journal.pntd.0004543. PubMed  
750 PMID: 26938868; PubMed Central PMCID: PMC4777396.
- 751 67. Paaijmans KP, Blanford S, Bell AS, Blanford JI, Read AF, Thomas MB. Influence of  
752 climate on malaria transmission depends on daily temperature variation. Proc Natl Acad Sci U S  
753 A. 2010;107(34):15135-9. Epub 2010/08/11. doi: 10.1073/pnas.1006422107. PubMed PMID:  
754 20696913; PubMed Central PMCID: PMC2930540.
- 755 68. Carrington LB, Armijos MV, Lambrechts L, Scott TW. Fluctuations at a low mean  
756 temperature accelerate dengue virus transmission by *Aedes aegypti*. PLoS Negl Trop Dis.  
757 2013;7(4):e2190. Epub 2013/05/03. doi: 10.1371/journal.pntd.0002190. PubMed PMID:  
758 23638208; PubMed Central PMCID: PMC3636080.
- 759 69. Carrington LB, Seifert SN, Armijos MV, Lambrechts L, Scott TW. Reduction of *Aedes*  
760 *aegypti* vector competence for dengue virus under large temperature fluctuations. Am J Trop  
761 Med Hyg. 2013;88(4):689-97. Epub 2013/02/27. doi: 10.4269/ajtmh.12-0488. PubMed PMID:  
762 23438766; PubMed Central PMCID: PMC3617853.
- 763 70. Carrington LB, Seifert SN, Willits NH, Lambrechts L, Scott TW. Large diurnal  
764 temperature fluctuations negatively influence *Aedes aegypti* (Diptera: Culicidae) life-history  
765 traits. J Med Entomol. 2013;50(1):43-51. Epub 2013/02/23. PubMed PMID: 23427651.
- 766 71. Lambrechts L, Paaijmans KP, Fansiri T, Carrington LB, Kramer LD, Thomas MB, et al.  
767 Impact of daily temperature fluctuations on dengue virus transmission by *Aedes aegypti*. Proc  
768 Natl Acad Sci U S A. 2011;108(18):7460-5. Epub 2011/04/20. doi: 10.1073/pnas.1101377108.  
769 PubMed PMID: 21502510; PubMed Central PMCID: PMC3088608.

770 72. Worner SP. Performance of Phenological Models Under Variable Temperature Regimes:  
771 Consequences of the Kaufmann or Rate Summation Effect. *Environ Entomol.* 1992;21(4):689-  
772 99. doi: 10.1093/ee/21.4.689.  
773

774 **S1 Fig. Experimental design**

775 In each biological replicate, eight thousand female *Aedes aegypti* mosquitoes were  
776 offered either an infectious blood meal containing ZIKV at the final concentration of  $10^6$   
777 PFU/mL or an uninfected, control blood meal. Two thousand ZIKV-exposed and two thousand  
778 control engorged mosquitoes were randomly distributed into mesh-covered paper cups (250 per  
779 cup) and put at one of eight temperature treatments 16°C, 20°C, 24°C, 28°C, 32°C, 34°C, 36°C,  
780 and 38°C. Every three days, up to day twenty-one, twenty ZIKV exposed mosquitoes per  
781 treatment group were force-salivated. After salivation, mosquito saliva, heads, legs, and bodies  
782 were collected into separate tubes. Each tissue was tested for the presence/absence of the ZIKV  
783 using plaque assays on Vero cells. Two full biological replicates were performed.

784 **S2 Fig. Infection, dissemination and infectiousness among alive mosquitoes.** The effect of  
785 eight different constant temperatures (16°C, 20°C, 24°C, 28°C, 32°C, 34°C, 36°C, 38°C) on the  
786 proportion of mosquitoes infected (ZIKV positive bodies compared to total number of processed  
787 mosquitoes), with disseminated infections (ZIKV positive heads compared to total number of  
788 processed mosquitoes), and infectious (ZIKV positive saliva compared to total number of  
789 processed mosquitoes).

790 **S3 Fig. Comparison of  $R_0(T)$  for Zika virus with the previous estimate of  $R_0(T)$  for dengue**  
791 **virus.** Comparison of the new estimate of  $R_0(T)$  for Zika virus (ZIKV; dark blue) with the  
792 previous estimate of  $R_0(T)$  for dengue virus (DENV; light blue) (Mordecai et al. 2017). Top  
793 shows  $R_0(T)$  means (solid lines) and 95% credible intervals (dashed lines) while bottom panels  
794 show the trait thermal response means for vector competence (bottom left), extrinsic incubation  
795 rate (bottom center), and lifespan (bottom right) for the new experimental data presented here  
796 (dark blue) and the previously published data (light blue) (Mordecai et al. 2017).

Proportion of mosquitoes

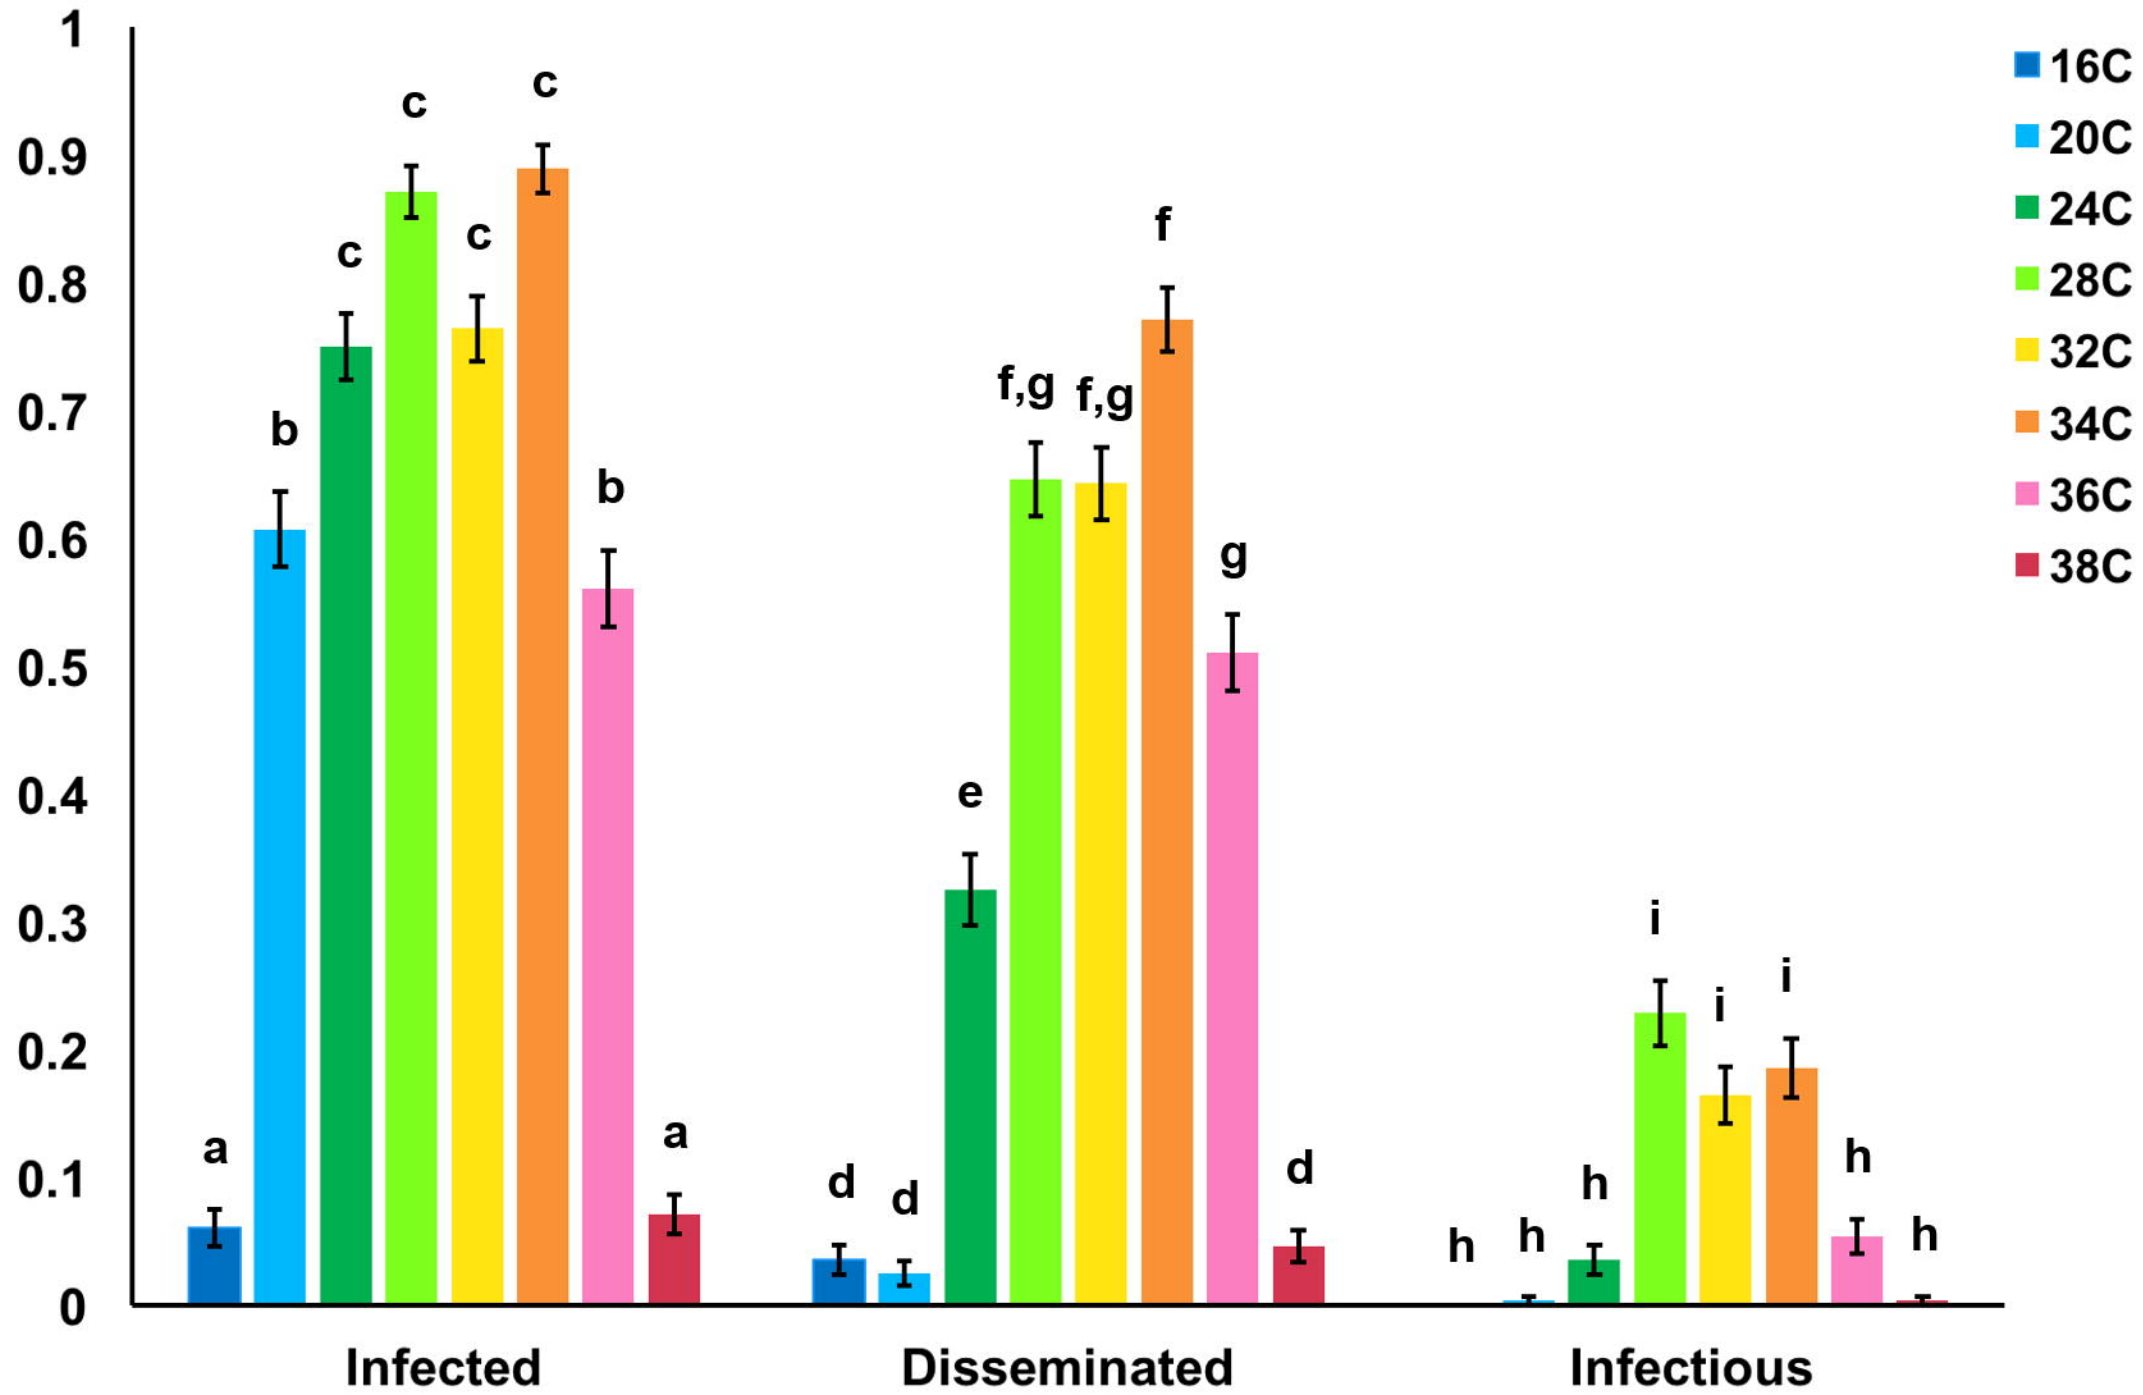



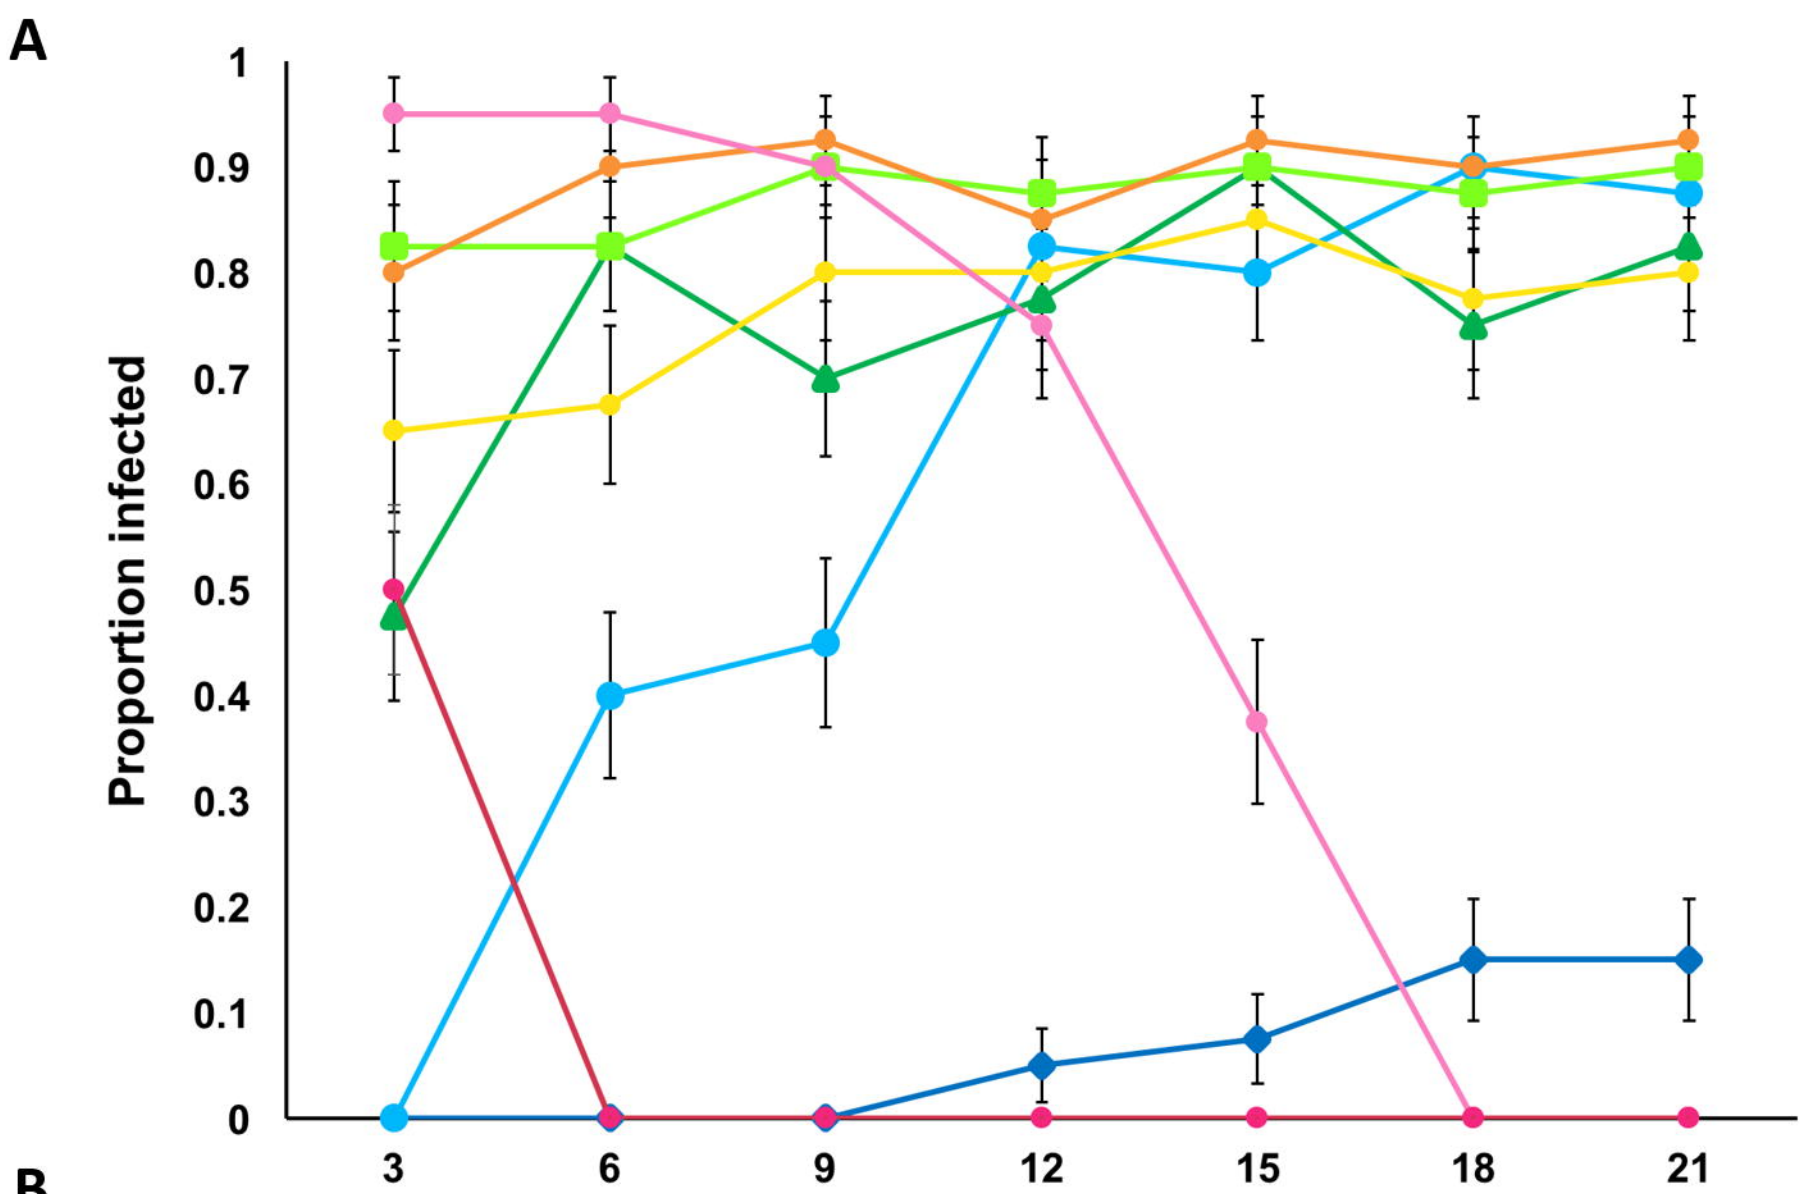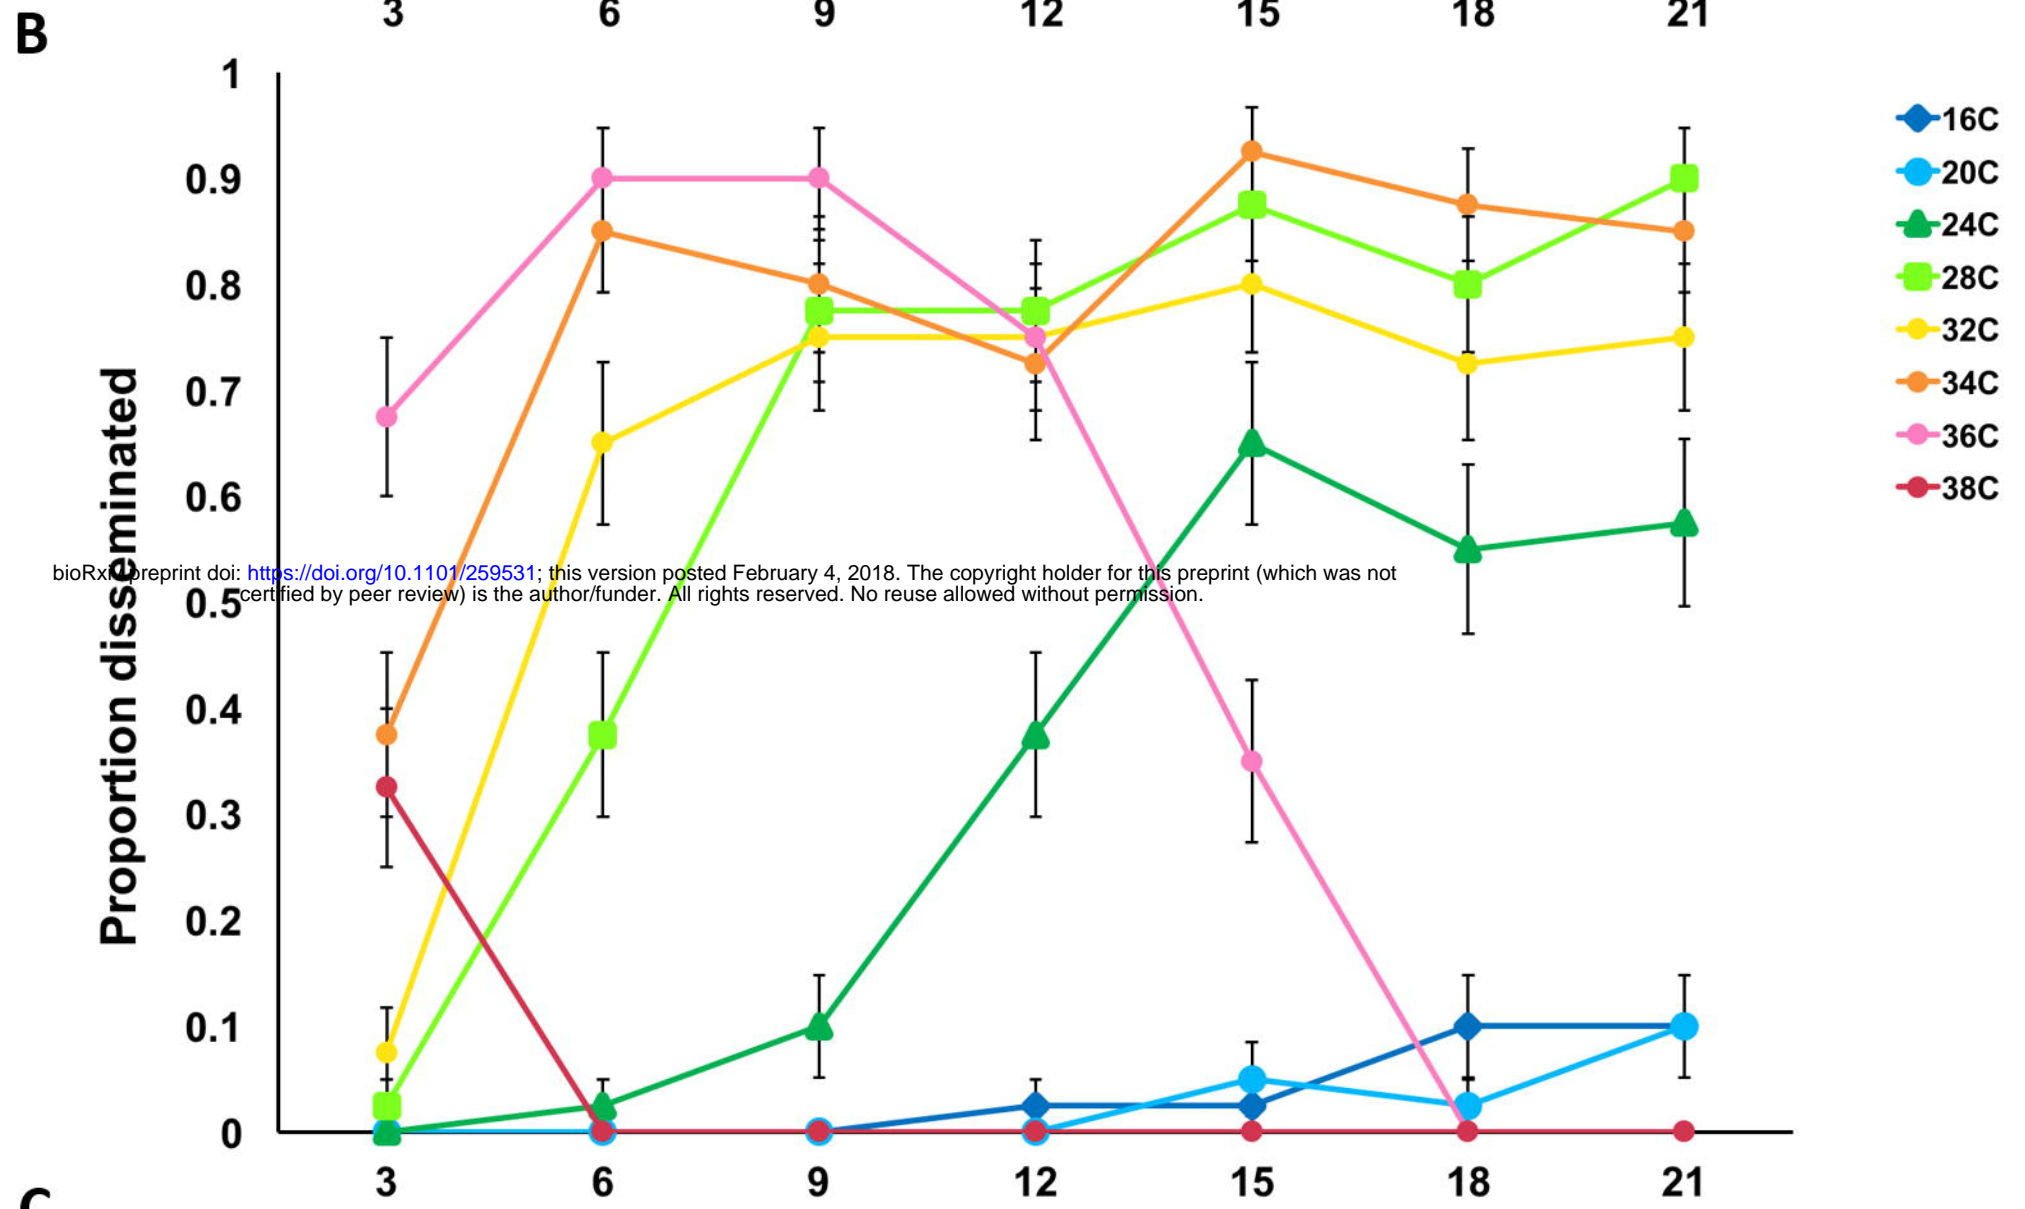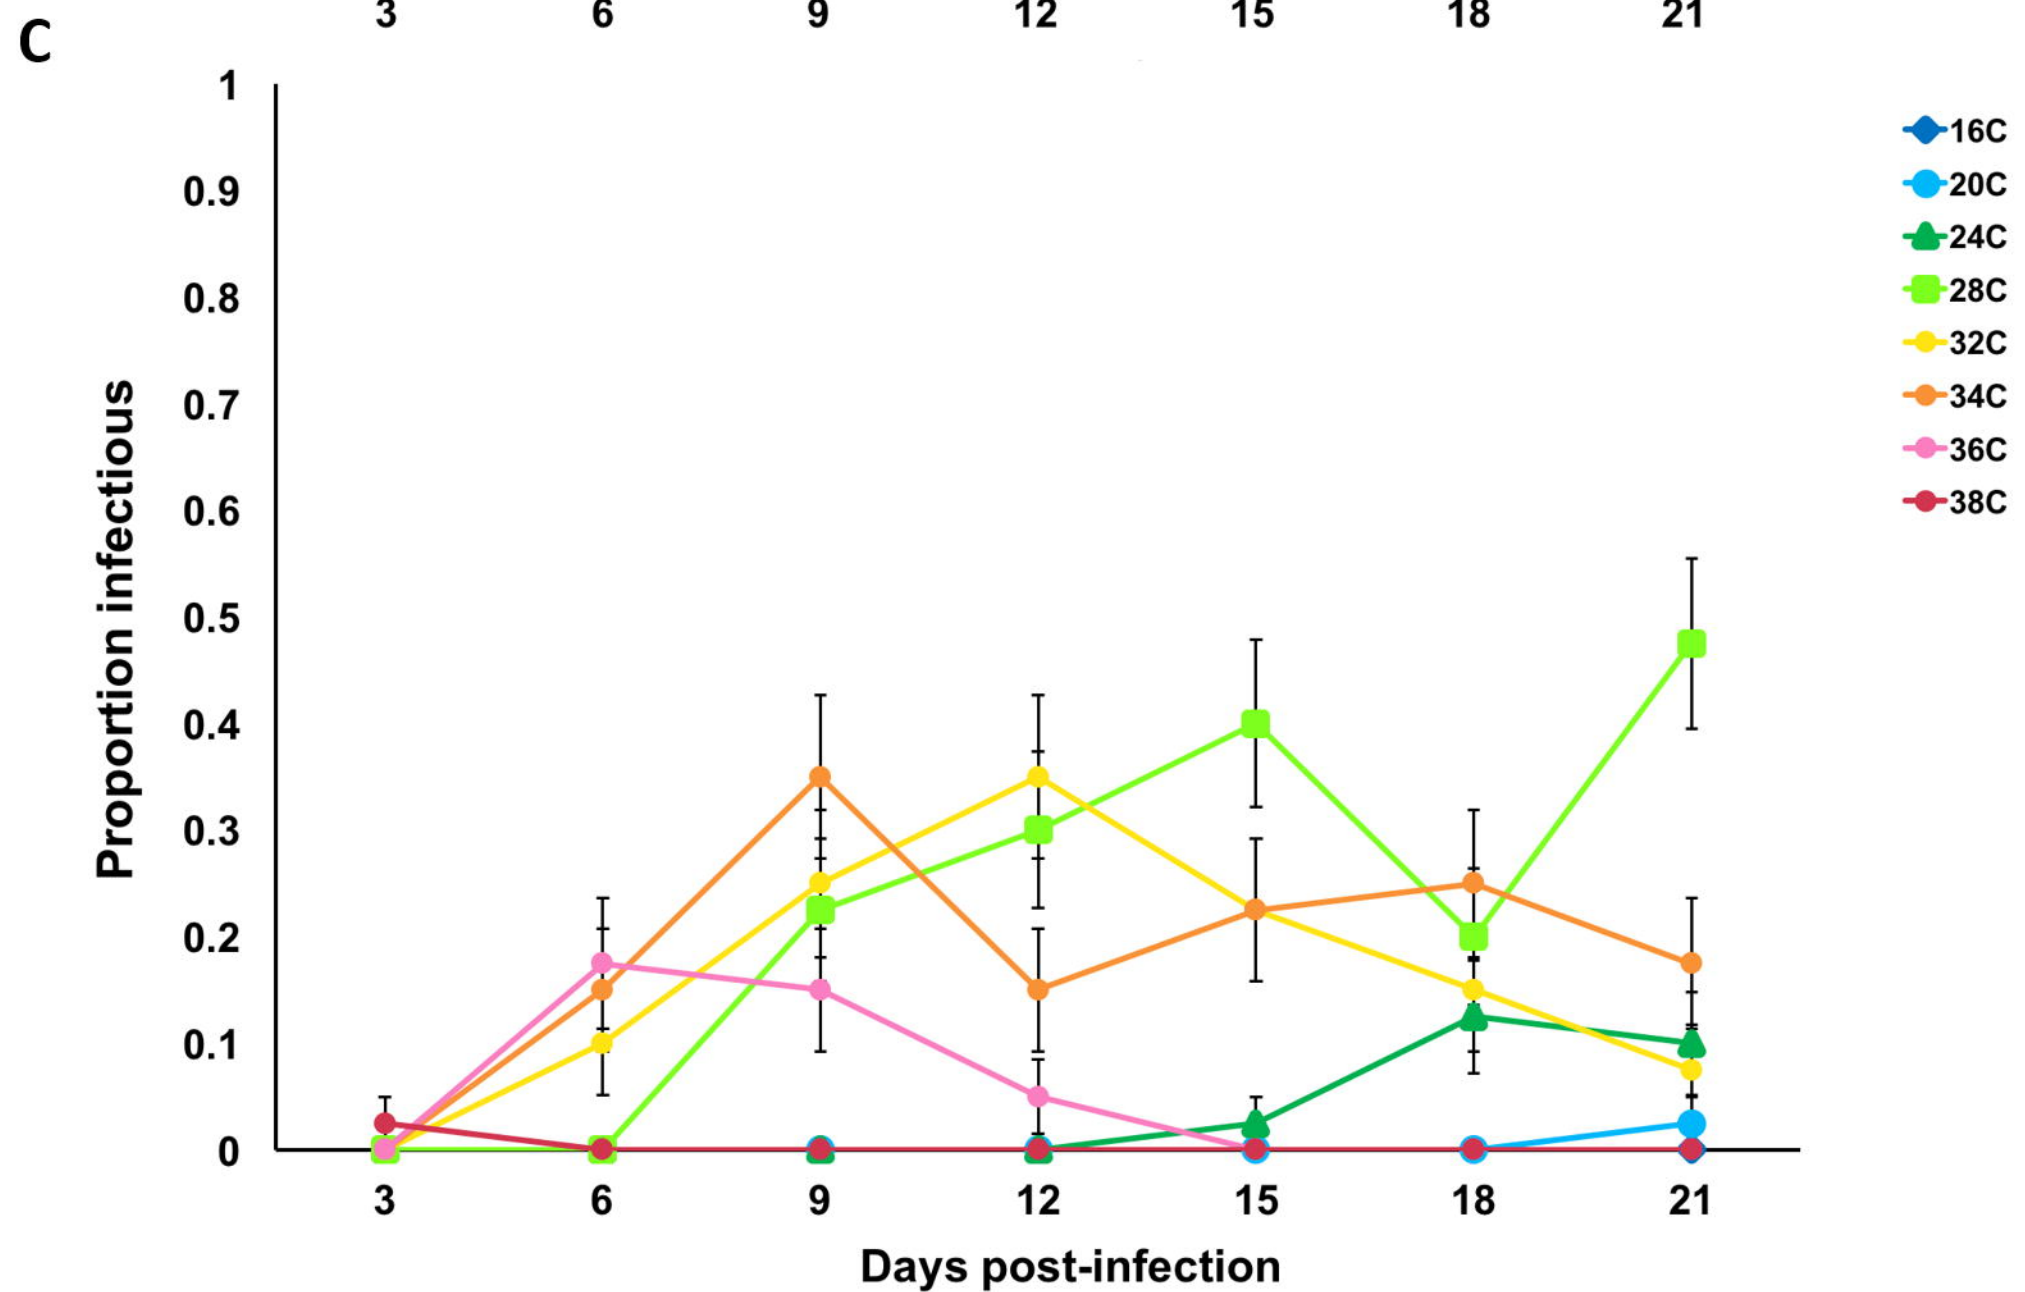

bioRxiv preprint doi: <https://doi.org/10.1101/259531>; this version posted February 4, 2018. The copyright holder for this preprint (which was not certified by peer review) is the author/funder. All rights reserved. No reuse allowed without permission.

A

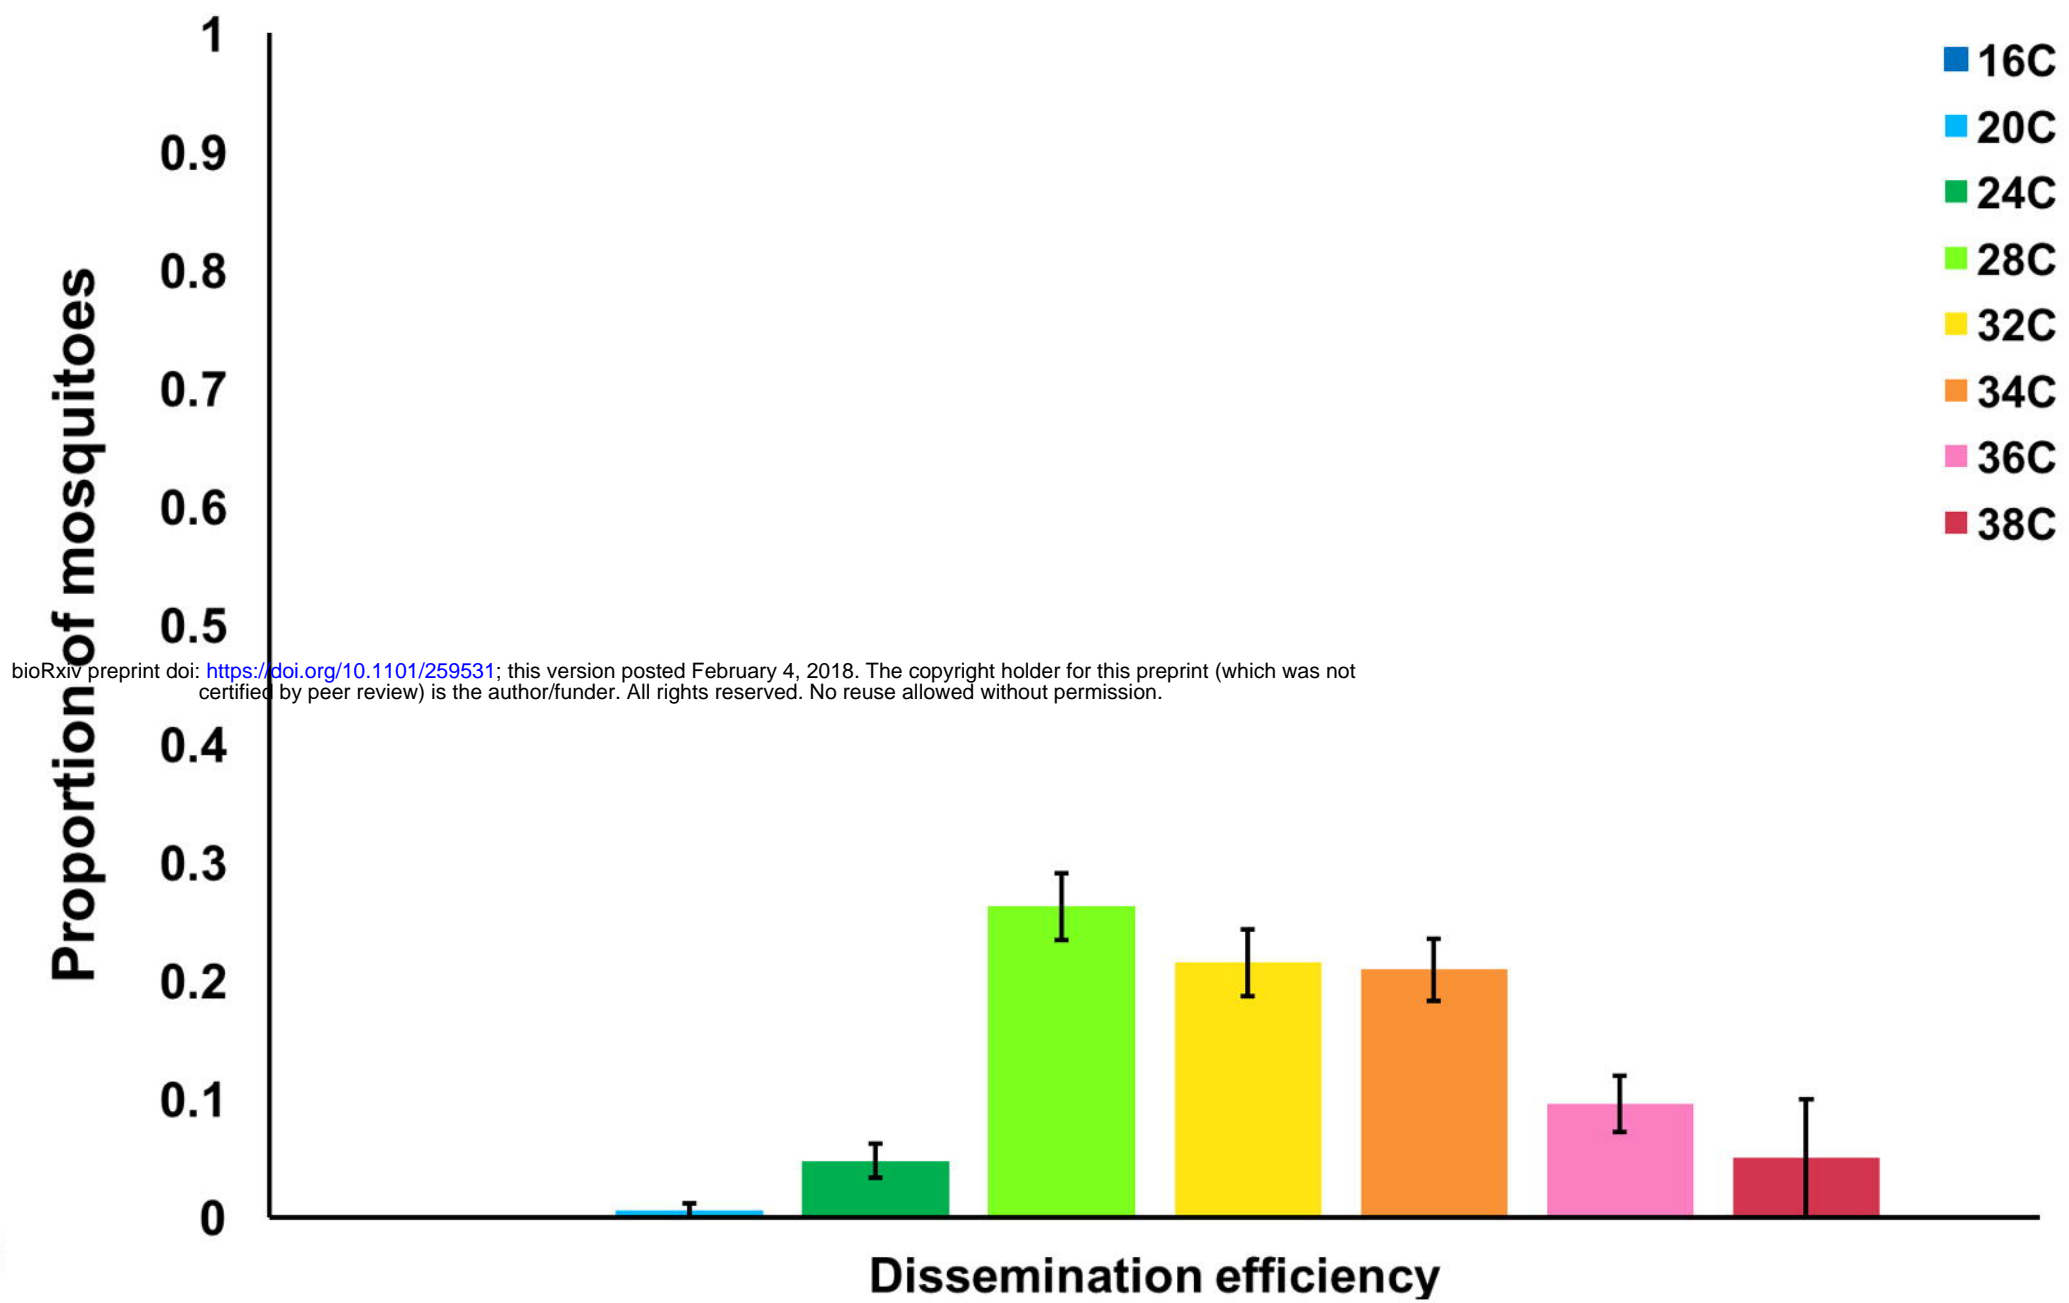

B

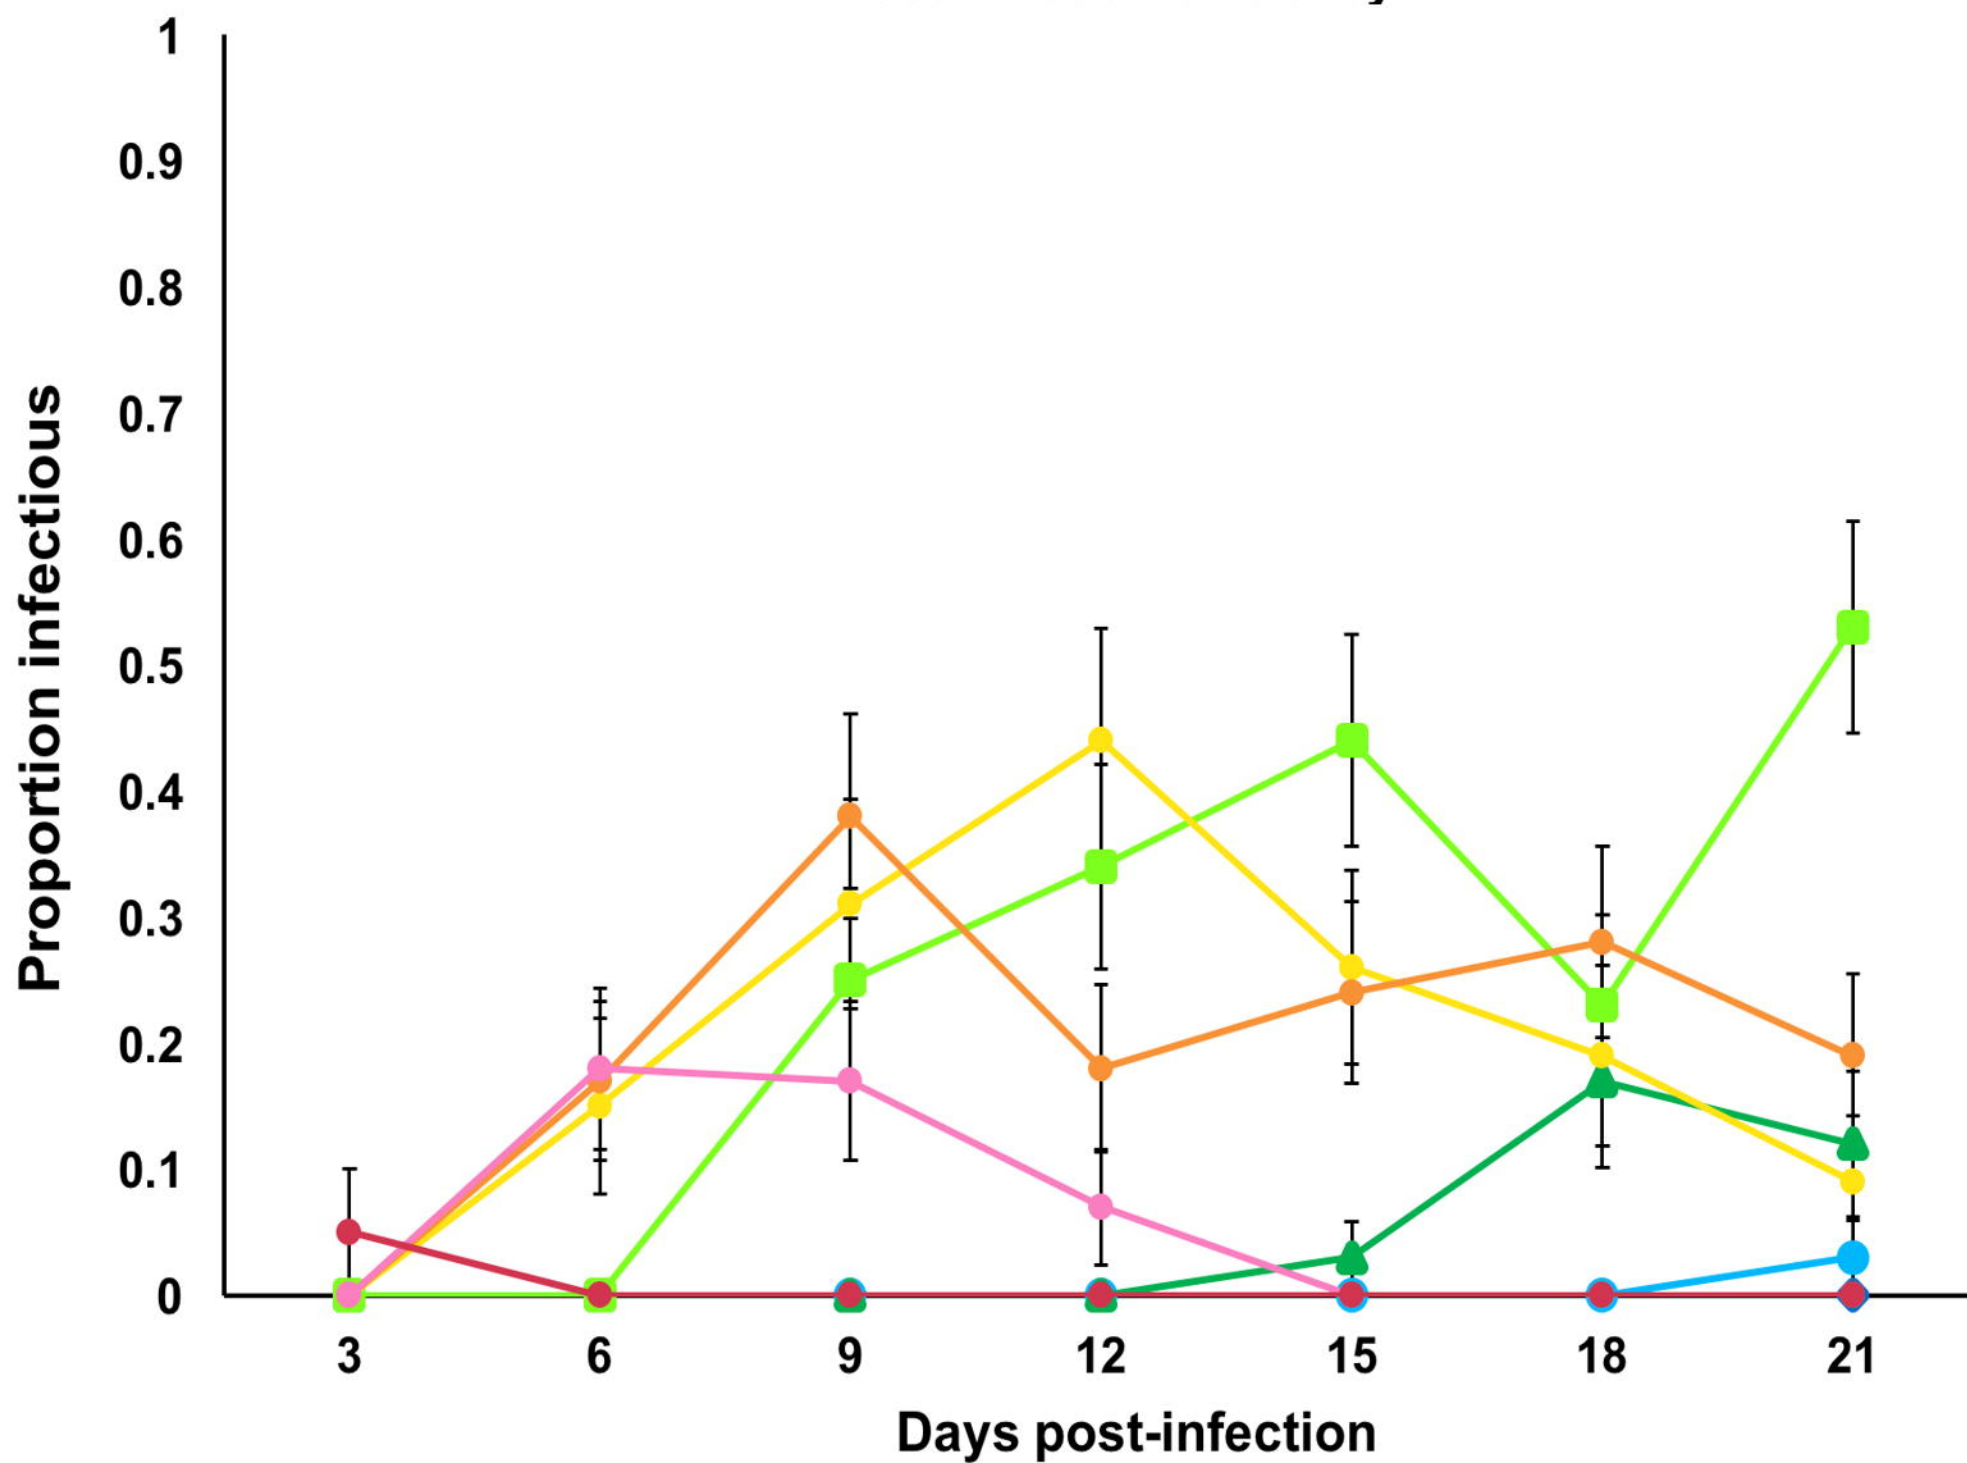



A

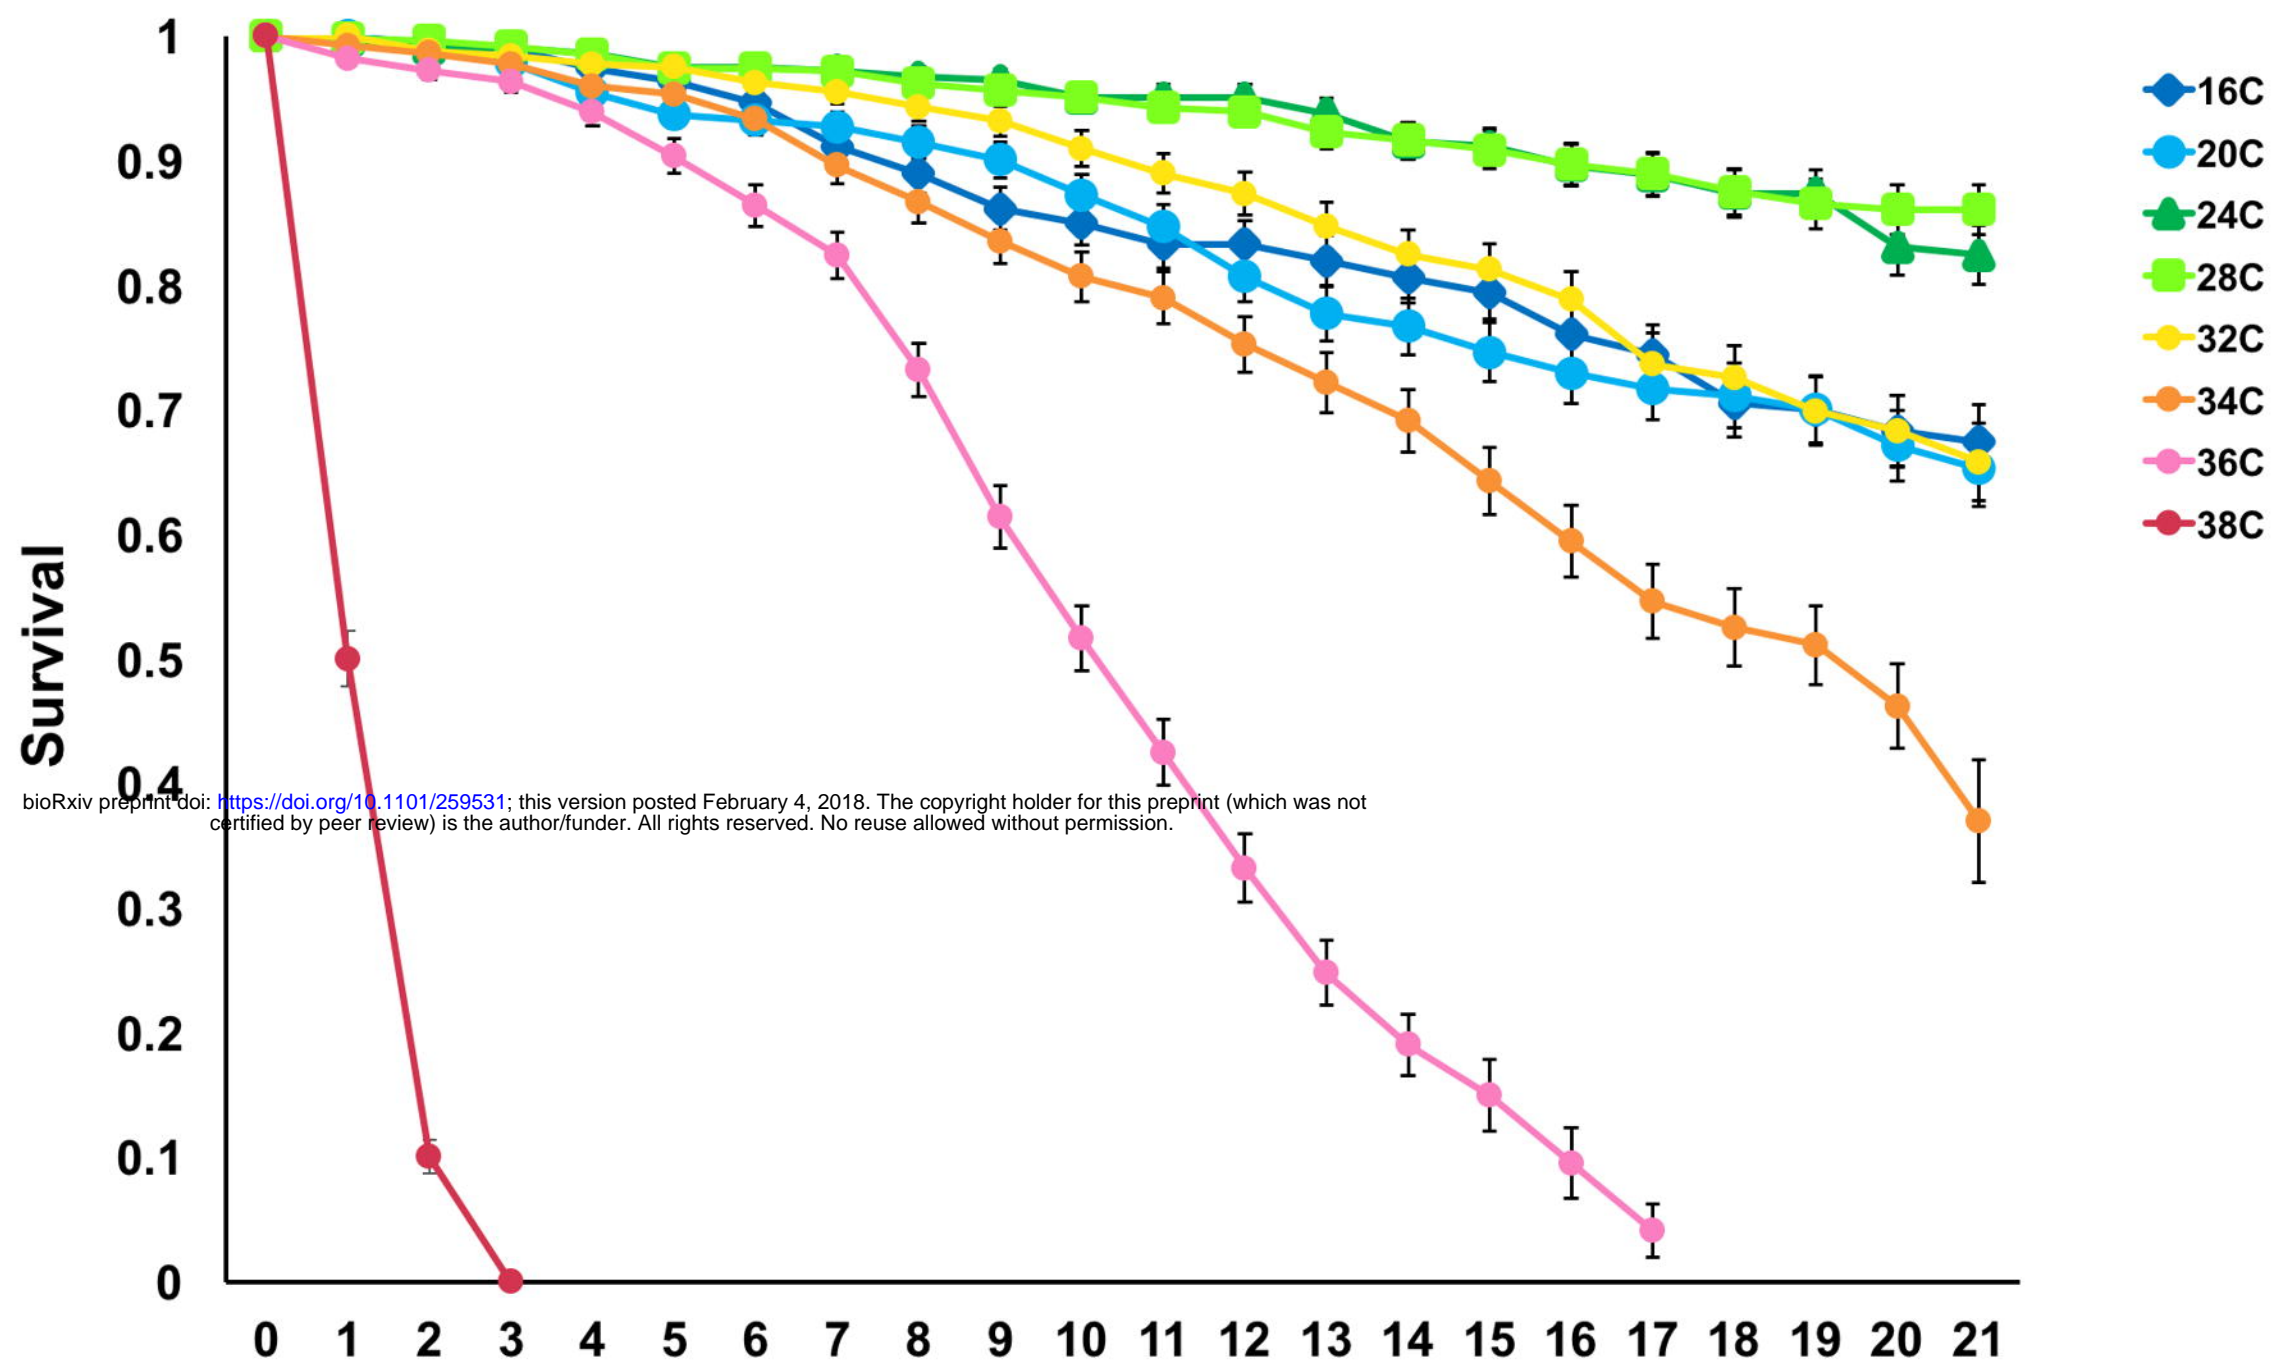

B

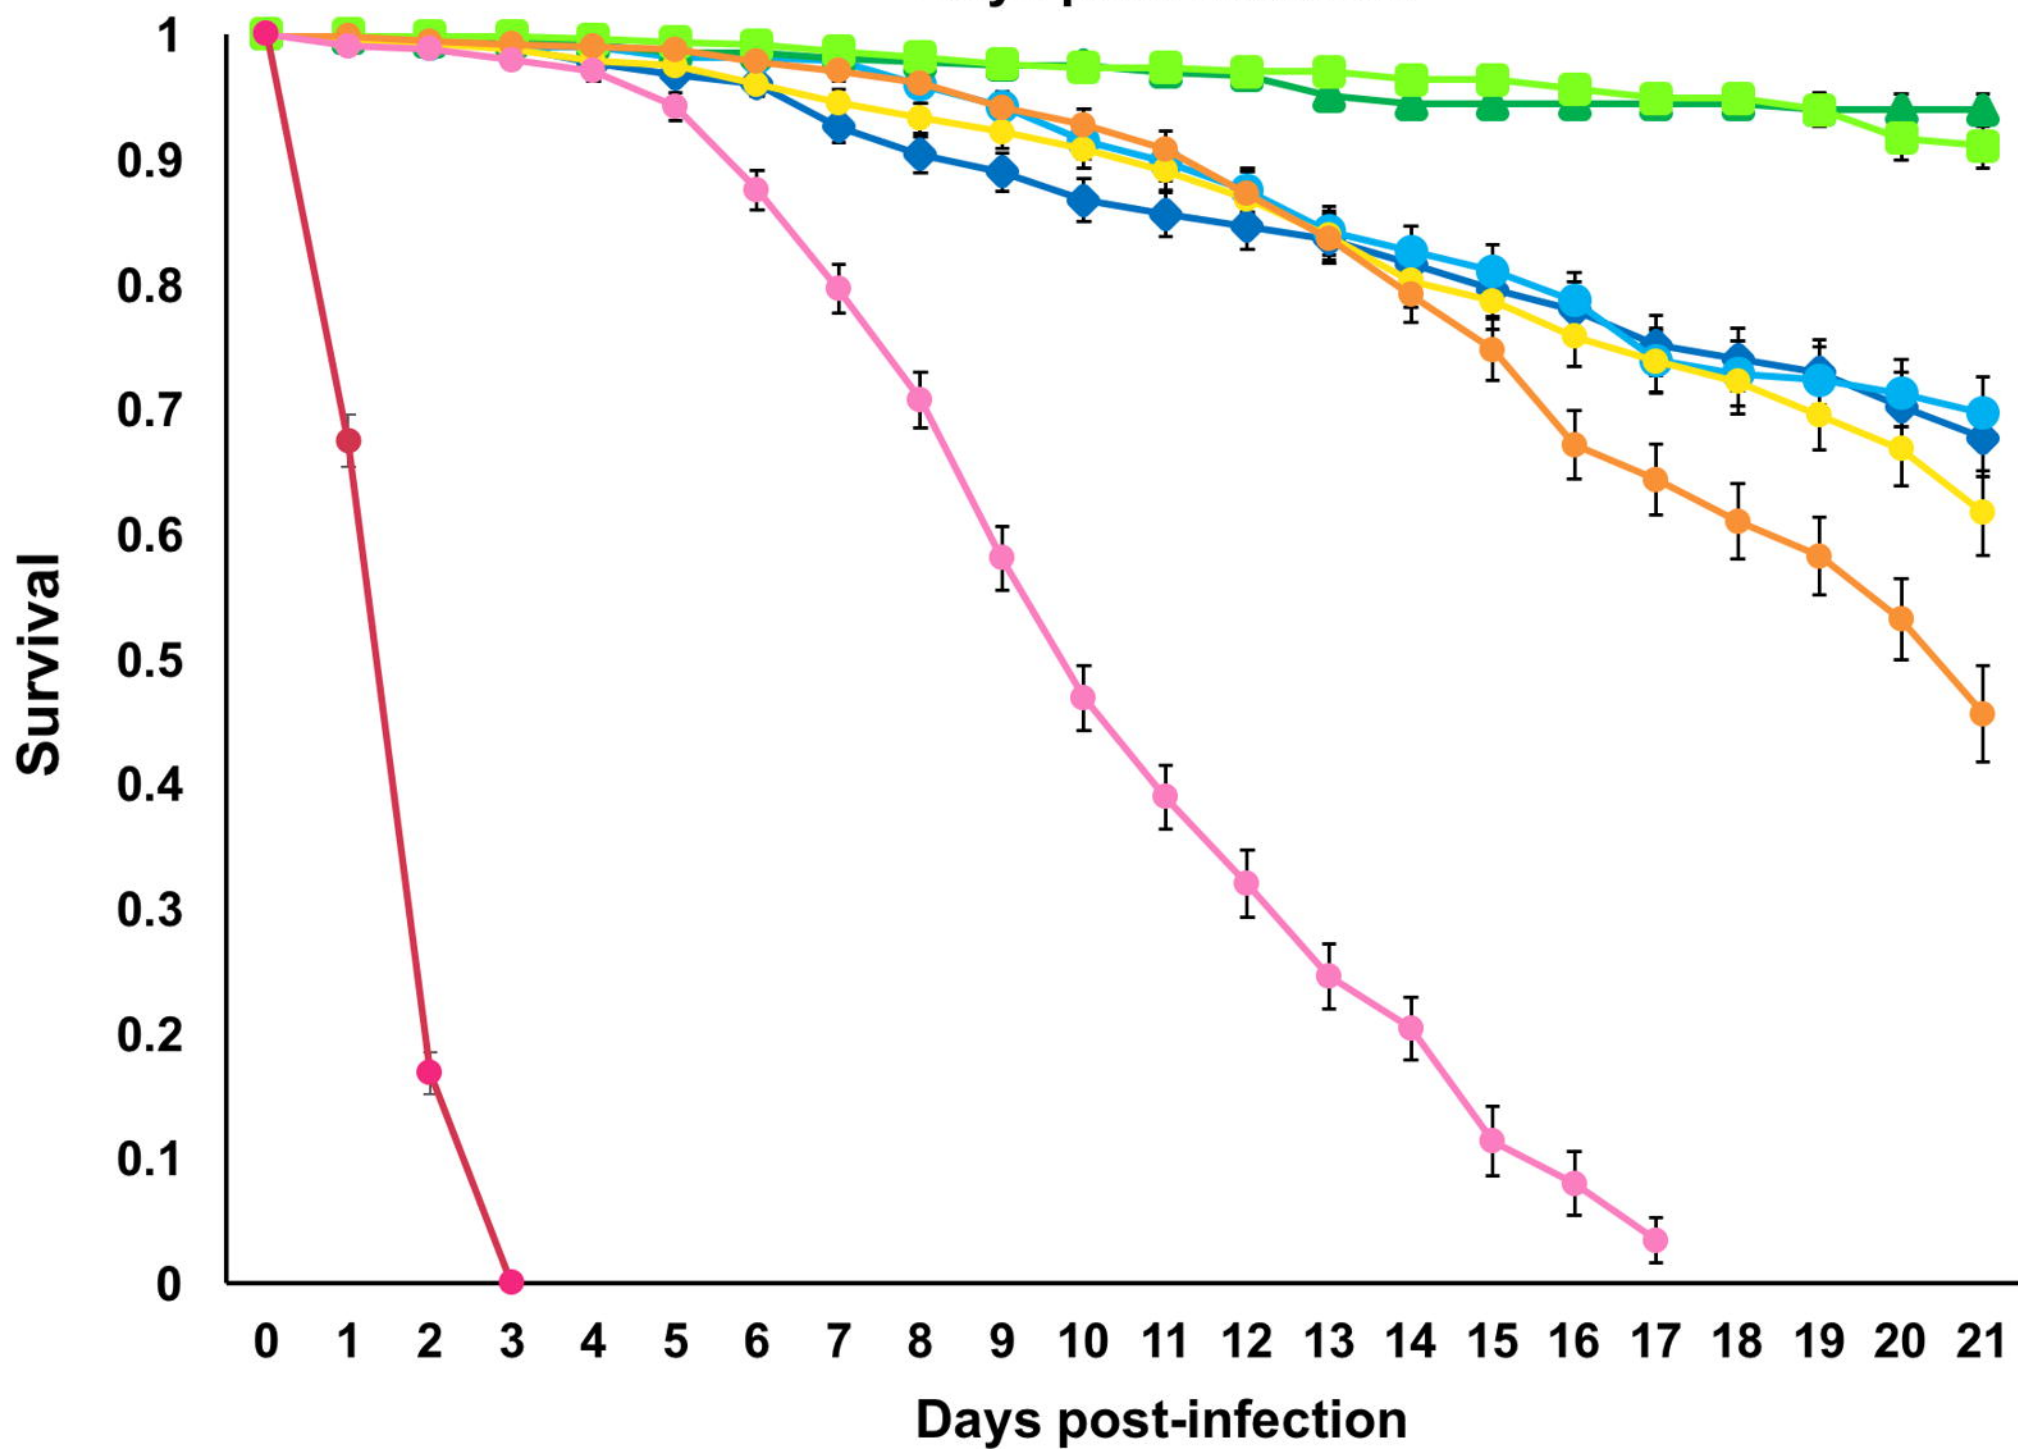

### Vector Competence

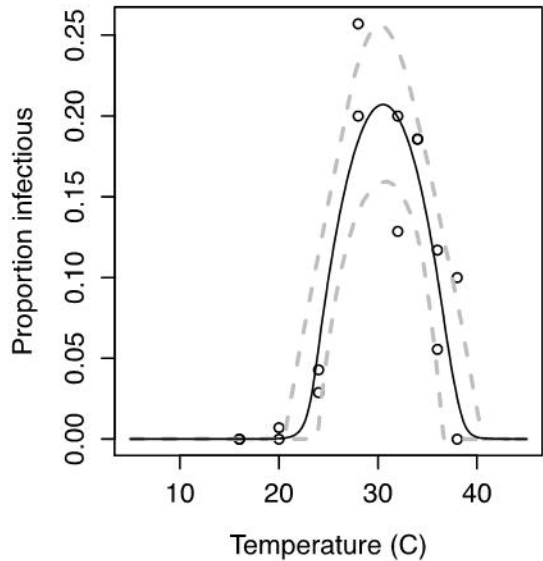

### Extrinsic Incubation Rate

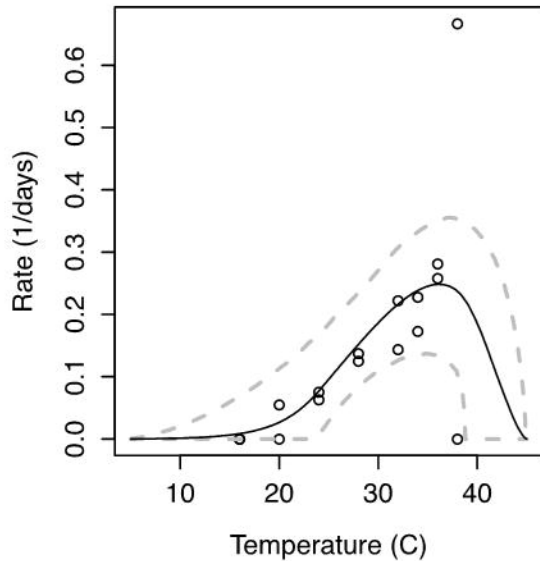

### Lifespan

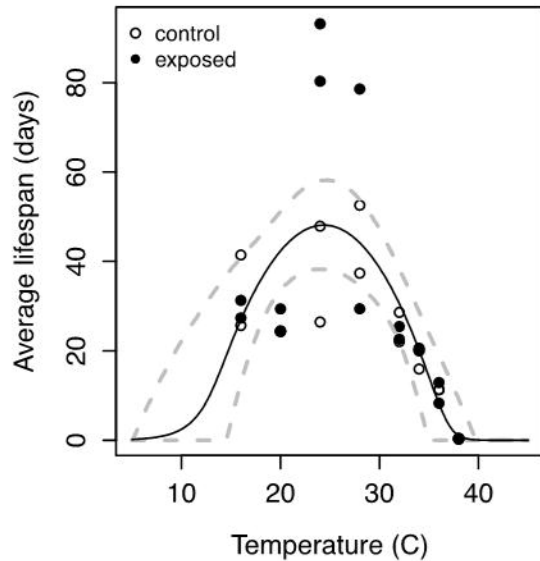

**A**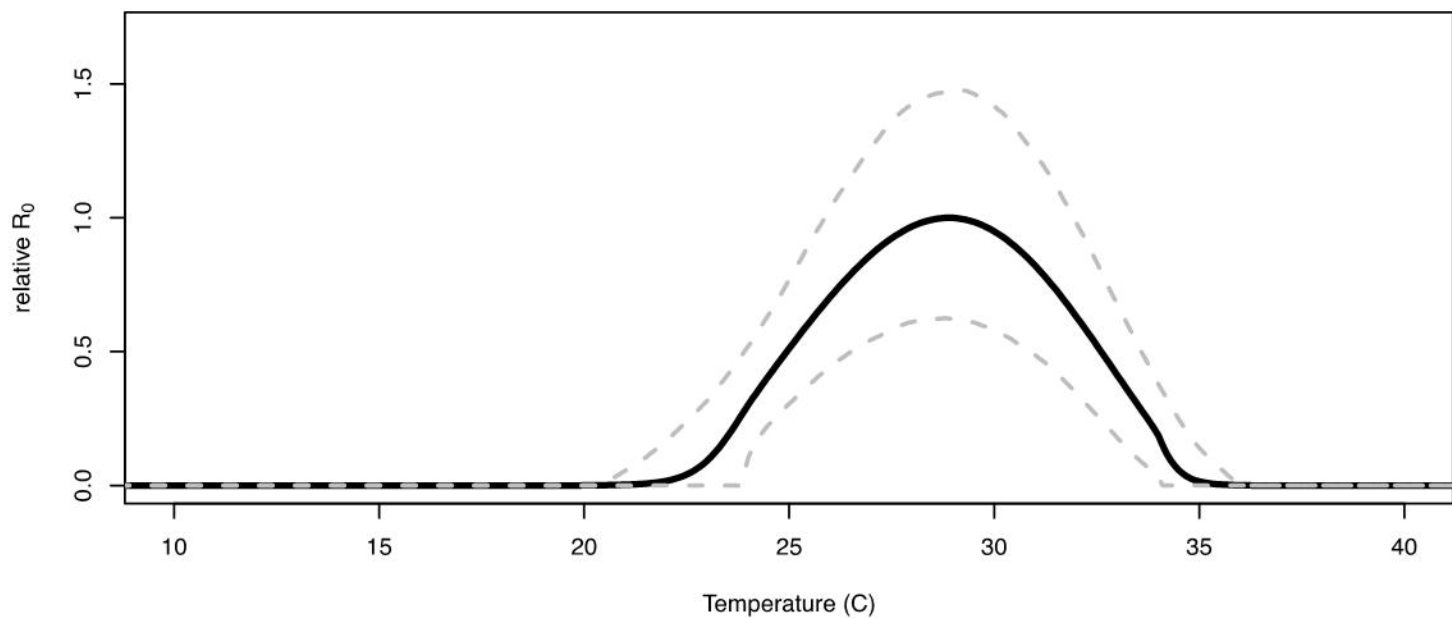**B**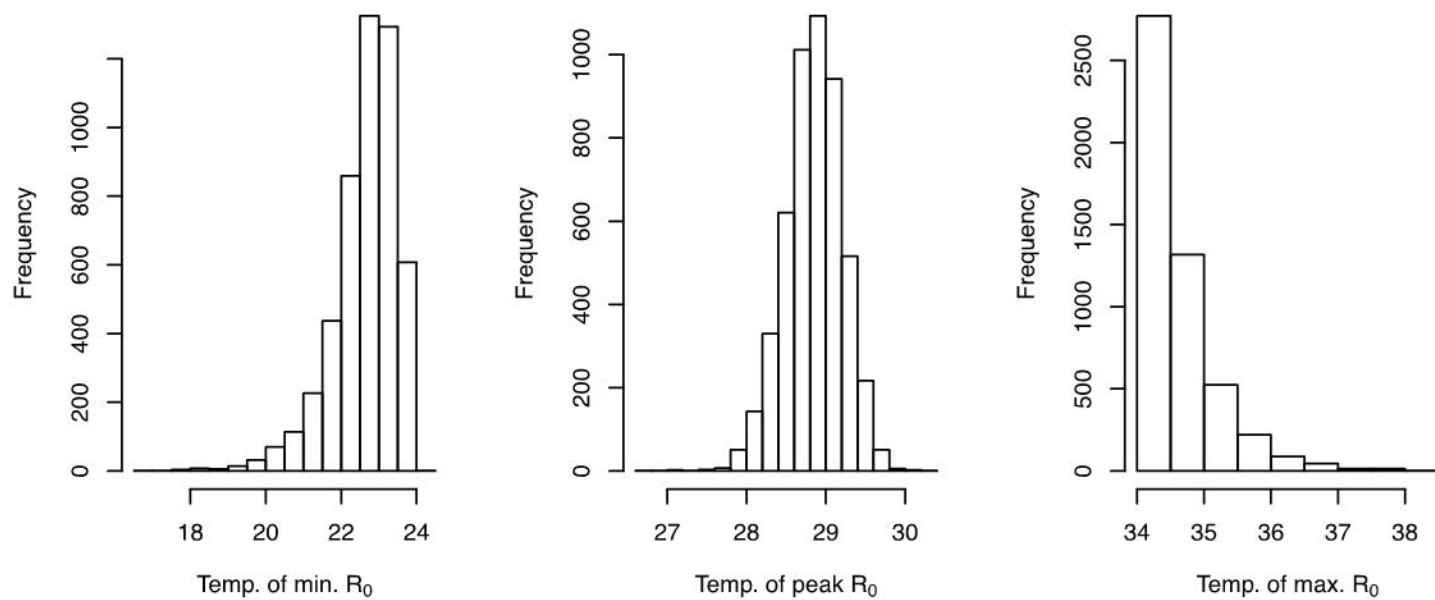

Source: http://biorxiv.org/content/10.1101/259531v1.full.pdf
